# Supplementary material for: 10-Dibenzothiophenyl-9,9-diphenylacridane-based multiple resonance emitters for high-efficiency narrowband green OLEDs with CIE y > 0.7 at high doping concentrations
Source: Royal Society of Chemistry journal article supplement (doi:10.1039/d4sc03705g), 2024-01-01
Supplement: d4sc03705g1.pdf [file d4sc03705g1.pdf]

## *Supporting Information*

# **10-Dibenzothiophenyl-9,9-diphenylacridane Based Multiple Resonance Emitters for High-Efficiency Narrowband Green OLEDs with CIE $y > 0.7$ at High Doping Concentration.**

*Rui Zhong, Mengyu Wang, Xingdong Wang, Shumeng Wang, Shiyang Shao\*, and Lixiang Wang\**

### **Table of Contents**

|                                                                       |     |
|-----------------------------------------------------------------------|-----|
| 1. Experimental Details .....                                         | S2  |
| 2. Synthetic Procedures .....                                         | S4  |
| 3. Crystallographic Data Collection and Structure Determination ..... | S13 |
| 4. DFT calculation .....                                              | S14 |
| 5. Thermal characteristics .....                                      | S18 |
| 6. Electrochemical measurements .....                                 | S18 |
| 7. Photophysical properties.....                                      | S19 |
| 8. OLED device performance .....                                      | S24 |
| 9. Appendix: NMR and mass spectra .....                               | S27 |
| 10.Supporting Information References.....                             | S39 |

## 1. Experimental Details

*General information.* The chemicals and reagents were obtained from commercial sources (TCI (Shanghai), SigmaAldrich (China) and Energy Chemical (Beijing)) and were used directly. *N, N*-dimethylformamide (DMF) and *tert*-butylbenzene were dried by CaH<sub>2</sub>, while tetrahydrofuran (THF) was distilled over sodium/benzophenone before use. <sup>1</sup>H and <sup>13</sup>C NMR spectra were recorded by Bruker Avance NMR spectrometers in CDCl<sub>3</sub> and C<sub>2</sub>D<sub>2</sub>Cl<sub>4</sub> with tetramethylsilane (TMS) as the internal standard. Matrix-assisted laser desorption/ionization time of flight (MALDI-TOF) mass spectra were measured on AXIMA CFR MS apparatus (COMPACT). Thermal gravimetric analysis (TGA) was performed on Perkin-Elmer-TGA 7 at heating rate of 10 °C/min with continuous nitrogen flow. Cyclic voltammetry (CV) was carried out in electrochemical workstation (CHI610E) with a typical three-electrode cell (glassy-carbon work electrode, calomel reference electrode and platinum counter electrode) using *n*-Bu<sub>4</sub>NClO<sub>4</sub> (0.1 M) as supporting electrolyte and ferrocene as reference at a scan rate of 50 mV s<sup>-1</sup>. The oxidation and reduction curves were recorded in dichloromethane and DMF (2 mg/mL), respectively. The highest occupied molecular orbital (HOMO) and the lowest unoccupied molecular orbital (LUMO) energy levels of the emitters were calculated according to equations of  $E_{\text{HOMO}}/E_{\text{LUMO}} = - (4.80 + E_{\text{onset}}^{\text{ox}}/E_{\text{onset}}^{\text{red}})$ , in which  $E_{\text{onset}}^{\text{ox}}$  and  $E_{\text{onset}}^{\text{red}}$  are the onset of oxidation and reduction potentials respectively.

*Photophysical measurements.* UV-visible absorption was measured by PerkinElmer Lambda 35 UV-vis spectrometer, and photoluminescence (PL) spectra were measured by PerkinElmer LS 50B spectrofluorometer, respectively. PL decay curves were detected on Edinburgh fluorescence spectrometer (FLSP-980). The absolute PLQY values were measured by integrating sphere on Hamamatsu Photonics C9920-2 with excitation wavelength of 345 nm.

*Computational method.* The calculations were performed with Gaussian 09 package [S1] using density functional theory (DFT) for frontier molecular orbital (FMO) distributions, and time-dependent density functional theory (TD-DFT) for electron excitation transition analysis at the M062x/def2SVP [S2] level. The SOC matrix elements were calculated using the optimized structures by ORCA software package (version

4.1).<sup>[S3]</sup> The excited states were calculated using SCS-CC2/cc-pVDZ by MRCC software package.<sup>[S4-5]</sup> Natural transition orbitals (NTO) were performed by Multiwfn (version 3.5)<sup>[S6]</sup> and drawn by VMD software (version 1.9.3)<sup>[S7]</sup>. The calculations of RMSD were also completed by VMD software.

*Calculation for the Photophysical Parameters.* The calculation formulas for the rate constant of radiative decay from  $S_1$  ( $k_r$ ), non-radiative decay rate constant from  $S_1$  ( $k_{nr}$ ), intersystem crossing ( $k_{ISC}$ ) and reverse intersystem crossing ( $k_{RISC}$ ) are expressed as follows<sup>[S8]</sup>:

$$k_s = 1/\tau_p$$

$$k_d = 1/\tau_d$$

$$k_r = \Phi_p/\tau_p$$

$$\Phi = k_s/(k_s+k_{nr})$$

$$\Phi_p = k_s/(k_s+k_{nr}+k_{ISC})$$

$$k_{RISC} = k_s k_d / (k_s - k_{ISC})$$

where  $\tau_p$  and  $\tau_d$  are the lifetimes of the prompt and delayed components, and  $\Phi$  and  $\Phi_p$  are the total and prompt components of the PL quantum efficiency, respectively.

## 2. Synthetic Procedures

### Scheme S1. Synthetic routes for control compound **PAC**.

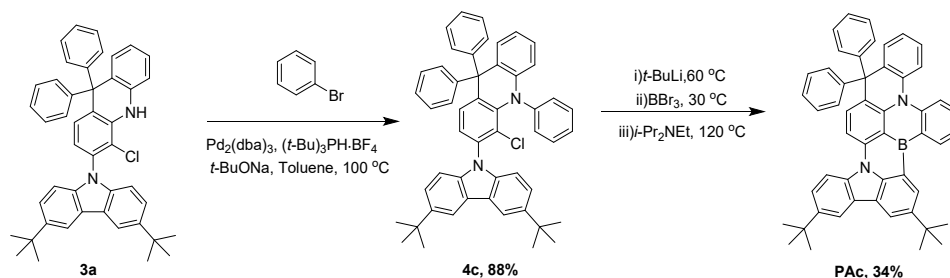

### Compound **1**

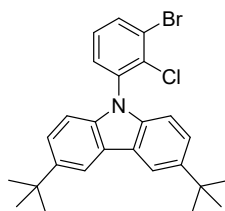

1

1-Bromo-2-chloro-3-fluorobenzene (32.0 g, 150 mmol), 3,6-bis(*tert*-butyl)-carbazole (46.0 g, 165 mmol) and cesium carbonate (70.0 g, 225 mmol) were mixed in dry DMF (300 mL) under an argon atmosphere. The reaction mixture was stirred at 90 °C for 6 hours and then cooled down. The resulting solution was slowly poured into ammonium chloride aqueous solution (1500 mL) and stirred for 30 minutes. Afterward, the precipitate was stirred three times with hot ethanol then dried in a vacuum in 80°C for 5 hours to afford **1** as white powder. Yield: 86 %. <sup>1</sup>H NMR (500 Mhz, CDCl<sub>3</sub>): δ = 8.16 (s, 2H), 7.81 (dd, *J*=8.1, 1.3, 1H), 7.48 – 7.43 (m, 3H), 7.32 (t, *J*=8.0, 1H), 7.00 (d, *J*=8.6, 2H), 1.48 (d, *J*=1.3, 18H). <sup>13</sup>C NMR: (126 MHz, CDCl<sub>3</sub>) δ = 143.12, 139.09, 137.27, 134.51, 133.56, 129.68, 128.30, 124.51, 123.69, 123.35, 116.36, 109.37, 34.74, 32.00. MALDI-TOF: Calculated: 467.1, Found: 467.1.

### Compound **2**

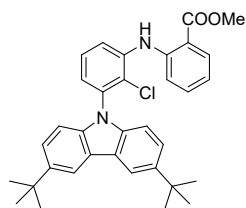

2

Methyl 2-aminobenzoate (18.6 mL, 144 mmol), **1** (56.4 g, 120 mmol), cesium carbonate (60.0 g, 180 mmol), palladium (II) acetate (0.54 g, 2.4 mmol) and Xantphos (2.80 g, 4.8 mmol) were dissolved in toluene (200 mL) under an argon atmosphere. The reaction mixture was stirred at 100 °C for 12 hours and then cooled down. The reaction mixture was poured into water (200 mL) and extracted with diethyl ether (200 mL). The combined organic layers were dried over sodium sulfate, filtered, and concentrated using a rotary evaporator. The residue was then subjected to column chromatography using dichloromethane/PE (1/10, v/v) as eluent to afford **2** as a faint yellow solid. Yield: 90 %. <sup>1</sup>H NMR (500 MHz, CDCl<sub>3</sub>) δ = 9.82 (s, 1H), 8.16 (s, 2H), 8.05 (dd, *J*=8.0, 1.2, 1H), 7.69 (dd, *J*=8.2, 1.0, 1H), 7.52 – 7.43 (m, 4H), 7.37 (t, *J*=8.0, 1H), 7.14 (dd, *J*=7.8, 1.1, 1H), 7.09 (d, *J*=8.6, 2H), 6.95 – 6.88 (m, 1H), 3.94 (s, 3H), 1.48 (s, 18H). <sup>13</sup>C NMR (126 MHz, CDCl<sub>3</sub>) δ = 168.55, 145.62, 142.77, 140.26, 139.29, 137.01, 134.01, 131.87, 127.37, 125.14, 123.76, 123.57, 123.27, 119.45, 119.00, 116.24, 115.35, 114.27, 109.63, 52.07, 34.73, 32.03, 26.91. MALDI-TOF: Calculated: 539.1, Found: 539.1.

### Compound **3a**

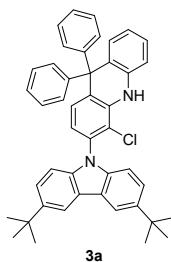

3a

A solution of phenylmagnesium bromide (240 mL, 1 M, 240 mmol) in THF was added dropwise to a solution of **2** (32 g, 60 mmol) in anhydrous THF (150 mL) at 0 °C then stirred at room temperature for 24 hours. After stirring, an ammonium chloride aqueous solution (20 mL) was added dropwise to quench excess phenylmagnesium

bromide. The reaction mixture was poured into water (200 mL) and extracted with diethyl ether (300 mL). The combined organic layers were dried with sodium sulfate, filtered, and concentrated using a rotary evaporator. After the organic solvent was completely removed, the resulting yellow solid was dissolved in THF (150 mL) and added boron trifluoride etherate (74.1 ml, 600 mmol) at room temperature. After stirring for 8 hours, the reaction mixture was poured into water (200 mL) and extracted with diethyl ether (300 mL). The combined organic layers were dried with sodium sulfate, filtered, and concentrated using a rotary evaporator. The residue was then subjected to column chromatography using dichloromethane/PE (1/1, v/v) as eluent to afford **3a** as a faint yellow solid. Yield: 91 %. <sup>1</sup>H NMR (500 MHz, C<sub>2</sub>D<sub>2</sub>Cl<sub>4</sub>) δ = 8.07 (d, *J*=1.7, 2H), 7.39 (dd, *J*=8.6, 1.8, 2H), 7.29 – 7.19 (m, 7H), 7.07 (s, 1H), 7.02 (d, *J*=8.6, 2H), 6.98 – 6.88 (m, 8H), 6.82 (d, *J*=7.4, 1H), 1.40 (s, 18H). <sup>13</sup>C NMR (126 MHz, C<sub>2</sub>D<sub>2</sub>Cl<sub>4</sub>) δ = 144.89, 142.37, 138.61, 138.00, 137.21, 133.39, 129.97, 129.70, 128.84, 128.37, 127.47, 127.18, 126.95, 126.19, 123.28, 122.41, 121.08, 119.92, 116.70, 115.63, 114.07, 109.36, 34.15, 31.55. MALDI-TOF: Calculated: 644.3, Found: 644.3.

#### Compound **3b**

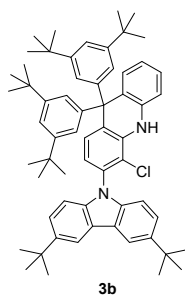

A solution of 1-bromo-3,5-di-*tert*-butylbenzene (74.2 mL, 1 M, 74.2 mmol) in THF was added dropwise into a flask with magnesium (1.78 g, 74.2 mmol) and a grain of iodine at room temperature and stirred for 8h to obtain 3,5-di-*tert*-butylphenylmagnesium bromide solution (1M). The aforementioned solution was added dropwise into a solution of **2** (8 g, 14.8 mmol) in anhydrous THF (150 mL) at 0 °C then stirred at room temperature for 24 hours. After stirring, an ammonium chloride aqueous solution (20 mL) was added dropwise to quench excess phenylmagnesium bromide. The reaction mixture was poured into water (100 mL) and extracted with diethyl ether (100 mL).

The combined organic layers were dried with sodium sulfate, filtered, and concentrated using a rotary evaporator. After the organic solvent was completely removed, the resulting yellow solid was dissolved in THF (100 mL) and added boron trifluoride etherate (18.5 ml, 150 mmol) at room temperature. After stirring for 8 hours, the reaction mixture was poured into water (100 mL) and extracted with diethyl ether (100 mL). The combined organic layers were dried with sodium sulfate, filtered, and concentrated using a rotary evaporator. The residue was then subjected to column chromatography using dichloromethane/PE (1/1, v/v) as eluent to afford **3b** as a faint yellow solid. Yield: 89 %.  $^1\text{H}$  NMR (500 MHz,  $\text{C}_2\text{D}_2\text{Cl}_4$ )  $\delta$  = 8.05 (d,  $J=1.0$ , 2H), 7.35 (dd,  $J=8.6$ , 1.5, 2H), 7.17 (m, 3H), 7.02 (s, 1H), 6.98 (d,  $J=8.6$ , 2H), 6.96 – 6.84 (m, 5H), 6.66 (d,  $J=0.9$ , 4H), 1.39 (s, 18H), 1.12 (s, 36H).  $^{13}\text{C}$  NMR (126 MHz,  $\text{C}_2\text{D}_2\text{Cl}_4$ )  $\delta$  = 149.04, 144.03, 142.17, 138.75, 137.96, 137.26, 132.86, 129.95, 129.22, 128.82, 127.56, 126.71, 124.12, 123.18, 122.31, 120.67, 119.45, 119.19, 116.34, 115.61, 113.60, 109.26, 34.17, 34.12, 31.55, 30.89. MALDI-TOF: Calculated: 868.5, Found: 868.5.

#### Compound **4a**

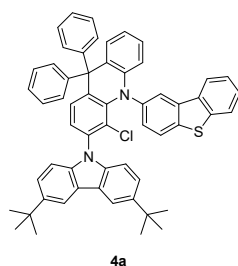

2-Bromodibenzothiophen (4.4 g, 16.8 mmol), **3a** (10.4 g, 16.0 mmol), *t*-BuONa (2.4 g, 24.0 mmol),  $\text{Pd}_2(\text{dba})_3$  (0.15 g, 0.16 mmol) and *t*-Bu<sub>3</sub>PH·BF<sub>4</sub> (0.19 g, 0.64 mmol) were dissolved in toluene (50 mL) under an argon atmosphere. The reaction mixture was stirred at 100 °C for 12 hours and then cooled down. The reaction mixture was poured into water (100 mL) and extracted with diethyl ether (100 mL). The combined organic layers were dried with sodium sulfate, filtered, and concentrated using a rotary evaporator. The residue was then subjected to column chromatography using dichloromethane/PE (1/10, v/v) as eluent to afford **4a** as a white solid. Yield: 90 %.  $^1\text{H}$  NMR (500 MHz,  $\text{C}_2\text{D}_2\text{Cl}_4$ )  $\delta$  = 7.97 (d,  $J=1.6$ , 2H), 7.72 (dd,  $J=6.1$ , 4.2, 2H), 7.69 – 7.64

(m, 1H), 7.49 (d,  $J=8.6$ , 1H), 7.39 – 7.33 (m, 2H), 7.33 – 7.29 (m, 1H), 7.25 (dd,  $J=8.6$ , 1.8, 2H), 7.23 – 7.10 (m, 9H), 7.08 – 7.03 (m, 1H), 7.00 (d,  $J=2.0$ , 1H), 6.93 (d,  $J=6.8$ , 4H), 6.89 (d,  $J=8.6$ , 2H), 6.73 (dd,  $J=7.9$ , 1.3, 1H), 1.32 (s, 18H).  $^{13}\text{C}$  NMR (126 MHz,  $\text{CD}_2\text{Cl}_2$ )  $\delta$  = 144.83, 143.03, 142.32, 142.23, 142.20, 142.16, 142.05, 142.03, 139.35, 139.32, 138.50, 138.48, 138.02, 135.30, 135.27, 134.91, 134.88, 134.70, 134.37, 134.34, 130.10, 129.80, 128.12, 127.61, 127.00, 126.56, 126.43, 126.39, 126.30, 124.60, 123.68, 123.59, 123.23, 122.47, 122.44, 122.37, 121.67, 121.27, 120.98, 116.41, 115.58, 109.23, 34.11, 31.49. MALDI-TOF: Calculated: 826.3, Found: 826.3.

#### Compound **4b**

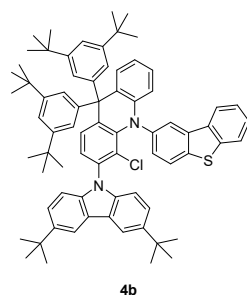

2-Bromodibenzothiophen (3.3 g, 12.1 mmol), **3b** (10.5 g, 12.7 mmol), *t*-BuONa (1.73 g, 18.0 mmol),  $\text{Pd}_2(\text{dba})_3$  (0.12 g, 0.13 mmol) and *t*-Bu<sub>3</sub>PH·BF<sub>4</sub> (0.15 g, 0.52 mmol) were dissolved in toluene (50 mL) under an argon atmosphere. The reaction mixture was stirred at 100 °C for 12 hours and then cooled down. The reaction mixture was poured into water (100 mL) and extracted with diethyl ether (100 mL). The combined organic layers were dried with sodium sulfate, filtered, and concentrated using a rotary evaporator. The residue was then subjected to column chromatography using dichloromethane/PE (1/10, v/v) as eluent to afford **4b** as a white solid. Yield: 84 %.  $^1\text{H}$  NMR (500 MHz,  $\text{C}_2\text{D}_2\text{Cl}_4$ )  $\delta$  = 7.97 (d,  $J=1.3$ , 2H), 7.71 – 7.65 (m, 1H), 7.61 (d,  $J=8.0$ , 2H), 7.40 (d,  $J=8.6$ , 1H), 7.18 (d,  $J=8.1$ , 4H), 7.06 (t,  $J=7.6$ , 1H), 6.96 (d,  $J=8.6$ , 1H), 6.92 (s, 1H), 6.86 (d,  $J=8.6$ , 2H), 6.80 (d,  $J=7.9$ , 1H), 6.68 (s, 4H), 1.33 (s, 18H), 1.03 (s, 36H).  $^{13}\text{C}$  NMR (126 MHz,  $\text{C}_2\text{D}_2\text{Cl}_4$ )  $\delta$  = 149.33, 144.03, 143.04, 142.86, 142.03, 141.91, 141.85, 139.17, 138.72, 138.36, 135.12, 134.70, 134.35, 134.28, 129.67, 127.90, 126.53, 126.14, 126.06, 125.29, 124.66, 123.41, 123.33, 123.13, 122.81, 122.26, 122.22, 121.39, 121.20, 120.35, 119.30, 116.71, 115.56, 109.00, 34.14, 34.06, 31.50, 30.76.



MALDI-TOF: Calculated: 1050.6, Found: 1050.6.

#### Compound **4c**

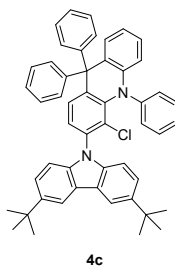

Bromobenzene (2.0 mL, 18.6 mmol), **3a** (10.4 g, 16.0 mmol), *t*-BuONa (2.4 g, 24.0 mmol), Pd<sub>2</sub>(dba)<sub>3</sub> (0.15 g, 0.16 mmol) and *t*-Bu<sub>3</sub>PH·BF<sub>4</sub> (0.19 g, 0.64 mmol) were dissolved in toluene (50 mL) under an argon atmosphere. The reaction mixture was stirred at 100 °C for 12 hours and then cooled down. The reaction mixture was poured into water (100 mL) and extracted with diethyl ether (100 mL). The combined organic layers were dried with sodium sulfate, filtered, and concentrated using a rotary evaporator. The residue was then subjected to column chromatography using dichloromethane/PE (1/10, v/v) as eluent to afford **4c** as a white solid. Yield: 88 %. <sup>1</sup>H NMR (500 MHz, C<sub>2</sub>D<sub>2</sub>Cl<sub>4</sub>) δ = 8.00 (d, *J*=1.7, 2H), 7.67 (dd, *J*=8.1, 0.9, 1H), 7.36 – 7.28 (m, 3H), 7.15 (dd, *J*=8.5, 5.6, 7H), 7.07 (d, *J*=8.3, 2H), 6.94 – 6.82 (m, 8H), 6.78 (t, *J*=7.3, 1H), 6.73 (d, *J*=1.3, 1H), 6.56 (d, *J*=7.7, 2H), 1.35 (s, 18H). <sup>13</sup>C NMR (126 MHz, C<sub>2</sub>D<sub>2</sub>Cl<sub>4</sub>) δ = 144.21, 143.31, 142.60, 142.37, 141.95, 139.53, 138.50, 134.58, 134.54, 134.52, 134.50, 130.00, 129.62, 127.91, 127.75, 127.49, 127.20, 127.19, 126.68, 126.40, 123.83, 123.45, 123.23, 122.58, 122.42, 121.17, 115.62, 109.27, 34.12, 31.52. MALDI-TOF: Calculated: 720.3, Found: 720.3.

#### Compound **BThPac-1**

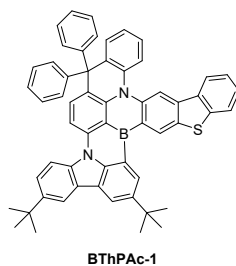

A solution of *t*-butyllithium in *n*-hexane (2.4 mL, 1.3 M, 3.0 mmol) was added dropwise into a solution of **4a** (1.0 g, 1.2 mmol) in anhydrous *tert*-butylbenzene (40 mL) at -30

°C under an argon atmosphere. When the addition was finished, the reaction mixture was slowly warmed to 60 °C and stirred for 6 hours. After boron tribromide (0.29 mL, 3.0 mmol) was added at -30 °C, the reaction mixture was slowly warmed to 35 °C and stirred for 3 hours. *N,N*-diisopropylethylamine (0.63 mL, 3.6 mmol) was then added at 0 °C and the mixture was stirred at 120 °C for 20 hours. After cooling to room temperature and quenching with water (2 mL), the reaction mixture was concentrated under vacuum at 80 °C. The residue was then subjected to column chromatography using dichloromethane/ PE (1/5, v/v) as eluent. The resulting mixture was recrystallized by *n*-hexane/ethanol for three times to afford **BThPac-1** as an orange solid. Yield: 55 %. <sup>1</sup>H NMR (500 MHz, C<sub>2</sub>D<sub>2</sub>Cl<sub>4</sub>) δ = 9.01 (s, 1H), 8.86 (d, *J*=1.6, 1H), 8.46 (d, *J*=1.7, 1H), 8.30 (s, 1H), 8.28 (d, *J*=8.9, 1H), 8.21 (d, *J*=2.0, 1H), 8.18 (d, *J*=8.7, 1H), 7.89 (d, *J*=7.9, 1H), 7.76 (d, *J*=7.9, 1H), 7.68 (d, *J*=8.1, 1H), 7.58 (dd, *J*=8.8, 2.0, 1H), 7.51 (d, *J*=8.6, 1H), 7.49 – 7.10 (m, 10H), 7.07 – 6.95 (m, 3H), 6.73 (s, 2H), 1.62 (s, 9H), 1.45 (s, 9H). <sup>13</sup>C NMR (126 MHz, C<sub>2</sub>D<sub>2</sub>Cl<sub>4</sub>) δ = 144.97, 144.95, 144.85, 144.60, 142.19, 141.87, 140.99, 140.65, 140.51, 140.21, 137.61, 137.05, 136.17, 134.40, 133.09, 133.04, 129.48, 129.07, 128.57, 128.45, 127.38, 127.33, 127.25, 126.46, 126.19, 126.06, 126.02, 124.66, 124.19, 123.94, 123.32, 123.16, 122.60, 121.91, 120.41, 120.12, 119.62, 119.56, 116.73, 113.62, 112.83, 106.28, 34.67, 34.20, 31.77, 31.31. MALDI-TOF: Calculated: 800.3, Found: 800.3.

#### Compound **BThPac-2**

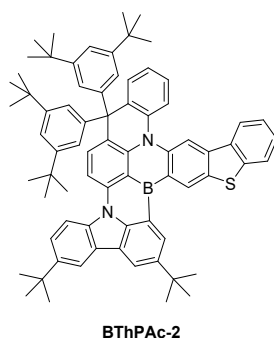

A solution of *t*-butyllithium in *n*-hexane (4.0 mL, 1.3 M, 5.0 mmol) was added dropwise into a solution of **4b** (2.1 g, 2.0 mmol) in anhydrous *tert*-butylbenzene (80 mL) at -30 °C under an argon atmosphere. When the addition was finished, the reaction mixture was slowly warmed to 60 °C and stirred for 6 hours. After boron tribromide (0.48 mL,

5.0 mmol) was added at -30 °C, the reaction mixture was slowly warmed to 35 °C and stirred for 3 hours. *N,N*-diisopropylethylamine (1.05 mL, 6.0 mmol) was then added at 0 °C and the mixture was stirred at 120 °C for 20 hours. After cooling to room temperature and quenching with water (2 mL), the reaction mixture was concentrated under vacuum at 80 °C. The residue was then subjected to column chromatography using dichloromethane/ PE (1/5, v/v) as eluent. The resulting mixture was recrystallized by *n*-hexane/ethanol for three times to afford **BThPAc-2** as an orange solid. Yield: 45 %. <sup>1</sup>H NMR (500 MHz, C<sub>2</sub>D<sub>2</sub>Cl<sub>4</sub>) δ = 9.04 (s, 1H), 8.91 (s, 1H), 8.49 (d, *J*=1.5, 1H), 8.42 (s, 1H), 8.39 (d, *J*=8.9, 1H), 8.25 (s, 2H), 7.88 (d, *J*=7.6, 1H), 7.81 – 7.69 (m, 3H), 7.63 (d, *J*=8.7, 1H), 7.44 – 7.31 (m, 4H), 7.22 (t, *J*=7.5, 1H), 7.15 (t, *J*=7.4, 1H), 7.01 – 6.91 (m, 3H), 6.60 (s, 1H), 6.47 (s, 1H), 1.65 (s, 9H), 1.48 (s, 9H), 1.26 (s, 9H), 1.20 (s, 9H), 1.17 (s, 9H), 0.85 (s, 9H). <sup>13</sup>C NMR (126 MHz, C<sub>2</sub>D<sub>2</sub>Cl<sub>4</sub>) δ = 148.97, 148.84, 148.72, 148.62, 148.59, 144.79, 144.51, 144.41, 143.38, 142.26, 142.12, 140.97, 140.46, 140.42, 139.86, 137.63, 137.06, 134.50, 132.88, 132.55, 129.46, 128.85, 128.59, 127.35, 126.30, 126.16, 125.95, 125.77, 125.60, 124.01, 123.96, 123.20, 122.99, 122.68, 122.44, 121.61, 120.22, 119.59, 119.11, 118.60, 116.75, 113.68, 113.12, 105.84, 73.63, 73.59, 73.37, 73.15, 34.64, 34.29, 34.21, 34.18, 31.77, 31.32, 31.03, 30.89, 30.64. MALDI-TOF: Calculated: 1024.6, Found: 1024.6.

#### Compound **PAc**

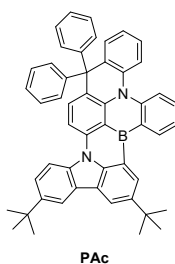

A solution of *t*-butyllithium in *n*-hexane (4.0 mL, 1.3 M, 5.0 mmol) was added dropwise into a solution of **4c** (1.4 g, 2.0 mmol) in anhydrous *tert*-butylbenzene (80 mL) at -30 °C under an argon atmosphere. When the addition was finished, the reaction mixture was slowly warmed to 60 °C and stirred for 6 hours. After boron tribromide (0.48 mL, 5.0 mmol) was added at -30 °C, the reaction mixture was slowly warmed to 35 °C and stirred for 3 hours. *N,N*-diisopropylethylamine (1.05 mL, 6.0 mmol) was then added

at 0 °C and the mixture was stirred at 120 °C for 20 hours. After cooling to room temperature and quenching with water (2 mL), the reaction mixture was concentrated under vacuum at 80 °C. The residue was then subjected to column chromatography using dichloromethane/ PE (1/5, v/v) as eluent. The resulting mixture was recrystallized by n-hexane/ethanol for three times to afford **PAc** as a yellow solid. Yield: 34 %. <sup>1</sup>H NMR (500 MHz, C<sub>2</sub>D<sub>2</sub>Cl<sub>4</sub>) δ = 8.81 (d, *J*=1.7, 1H), 8.63 (dd, *J*=7.6, 1.2, 1H), 8.40 (d, *J*=1.7, 1H), 8.25 (d, *J*=8.9, 1H), 8.17 (d, *J*=2.0, 1H), 8.13 (d, *J*=8.7, 1H), 7.65 (d, *J*=8.4, 1H), 7.59 – 7.53 (m, 2H), 7.49 (d, *J*=8.6, 1H), 7.45 – 6.59 (m, 15H), 1.56 (s, 9H), 1.43 (s, 9H). <sup>13</sup>C NMR (126 MHz, C<sub>2</sub>D<sub>2</sub>Cl<sub>4</sub>) δ = 144.92, 144.84, 144.73, 144.51, 144.36, 141.99, 140.95, 140.18, 140.04, 137.54, 136.02, 135.07, 132.85, 129.97, 129.35, 128.94, 128.36, 127.26, 127.20, 126.39, 126.12, 125.88, 125.80, 124.63, 124.08, 123.30, 122.92, 122.21, 120.53, 120.26, 120.08, 119.93, 119.76, 116.64, 113.54, 106.16, .59, 34.17, 31.72, 31.29. MALDI-TOF: Calculated: 733.4, Found: 733.4.

### 3. Crystallographic Data Collection and Structure Determination

**Table S1.** Crystal data and structure refinement of **BThPAc-1**. (CCDC number: 2350022).

|                                             |                                                                |
|---------------------------------------------|----------------------------------------------------------------|
| Identification code                         | BNNS                                                           |
| Empirical formula                           | C <sub>60</sub> H <sub>52</sub> BN <sub>2</sub> S              |
| Formula weight                              | 843.9                                                          |
| Temperature/K                               | 300                                                            |
| Crystal system                              | triclinic                                                      |
| Space group                                 | P-1                                                            |
| a/Å                                         | 11.287(6)                                                      |
| b/Å                                         | 12.693(6)                                                      |
| c/Å                                         | 18.454(10)                                                     |
| α/°                                         | 101.306(14)                                                    |
| β/°                                         | 101.726(15)                                                    |
| γ/°                                         | 97.471(14)                                                     |
| Volume/Å <sup>3</sup>                       | 2499(2)                                                        |
| Z                                           | 2                                                              |
| ρ <sub>calc</sub> /cm <sup>3</sup>          | 1.122                                                          |
| μ/mm <sup>-1</sup>                          | 0.104                                                          |
| F(000)                                      | 894                                                            |
| Crystal size/mm <sup>3</sup>                | 0.2 × 0.2 × 0.1                                                |
| Radiation                                   | MoKα (λ = 0.71073)                                             |
| 2θ range for data collection/°              | 3.912 to 60.784                                                |
| Index ranges                                | -16 ≤ h ≤ 15, -17 ≤ k ≤ 17, -26 ≤ l ≤ 26                       |
| Reflections collected                       | 139869                                                         |
| Independent reflections                     | 14837 [R <sub>int</sub> = 0.1410, R <sub>sigma</sub> = 0.0918] |
| Data/restraints/parameters                  | 14837/46/612                                                   |
| Goodness-of-fit on F <sup>2</sup>           | 1.066                                                          |
| Final R indexes [I >= 2σ (I)]               | R <sub>1</sub> = 0.0976, wR <sub>2</sub> = 0.2474              |
| Final R indexes [all data]                  | R <sub>1</sub> = 0.1857, wR <sub>2</sub> = 0.3020              |
| Largest diff. peak/hole / e Å <sup>-3</sup> | 0.92/-0.41                                                     |

#### 4. DFT calculation

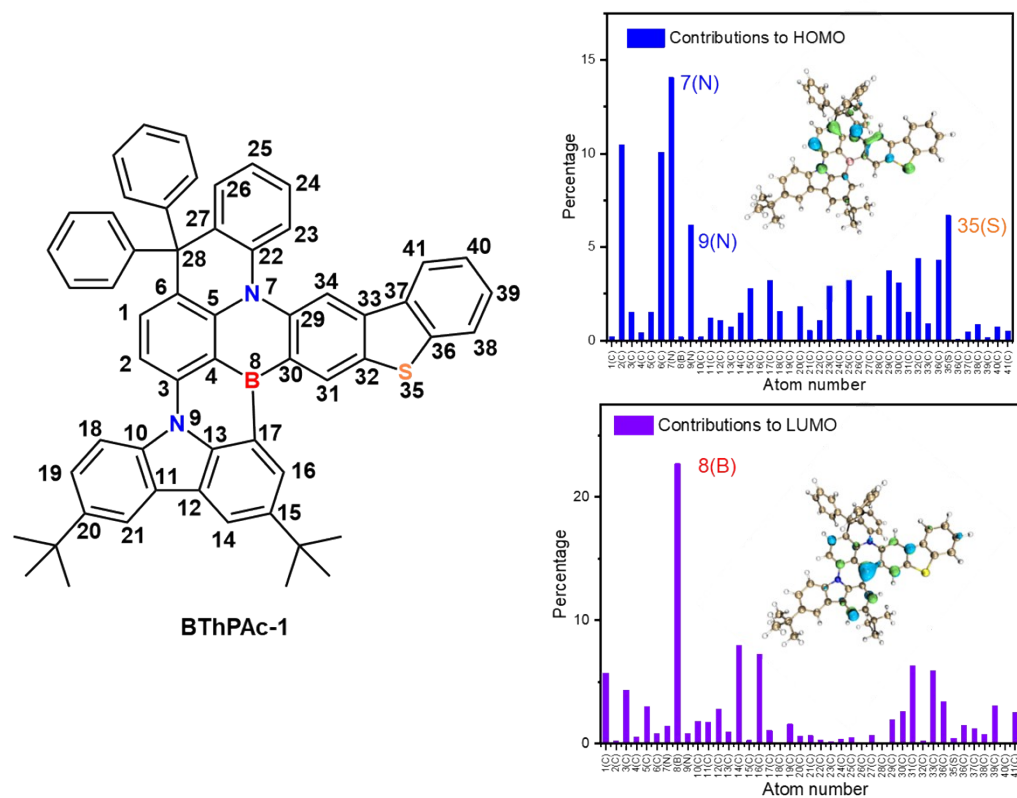

Figure S1. Mulliken analysis for BThPac-1 by Multiwfn software package.

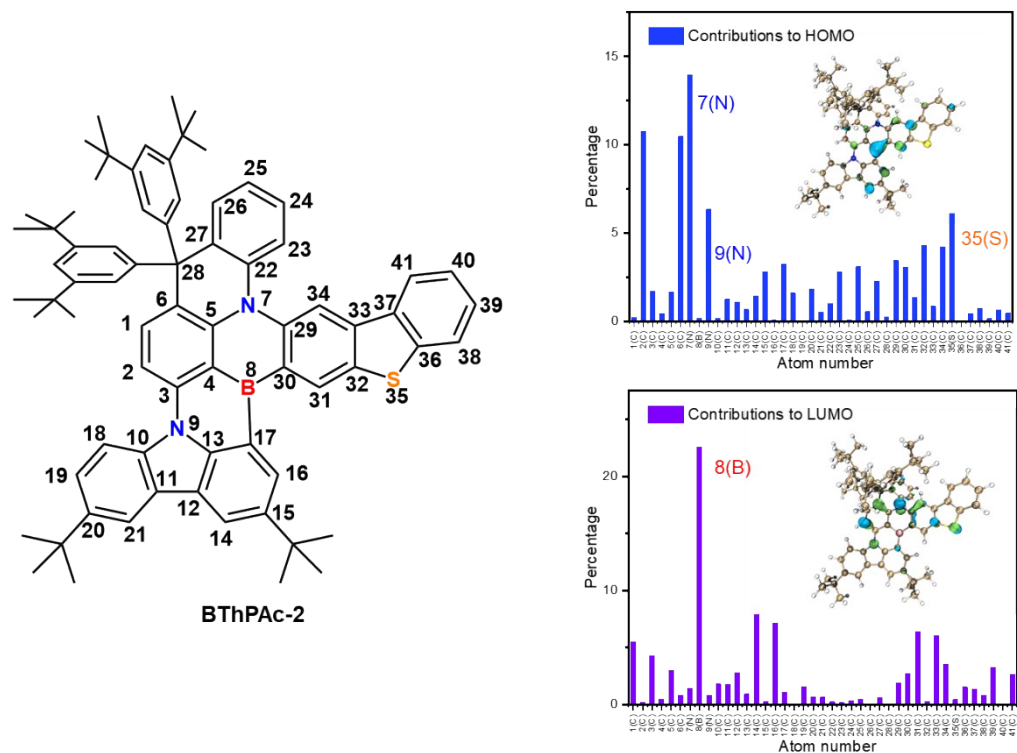

Figure S2. Mulliken analysis for BThPac-2 by Multiwfn software package.

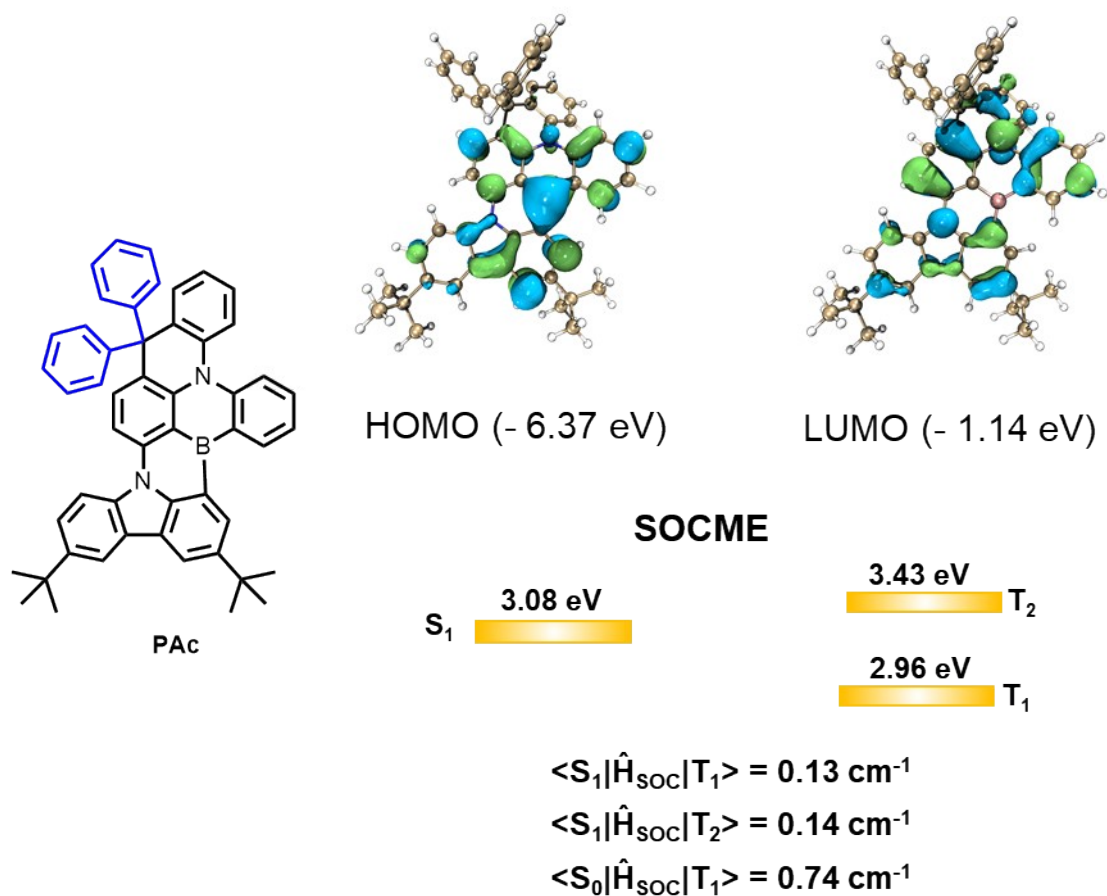

Figure S3. HOMO/LUMO distributions and SOCME values for PAc.

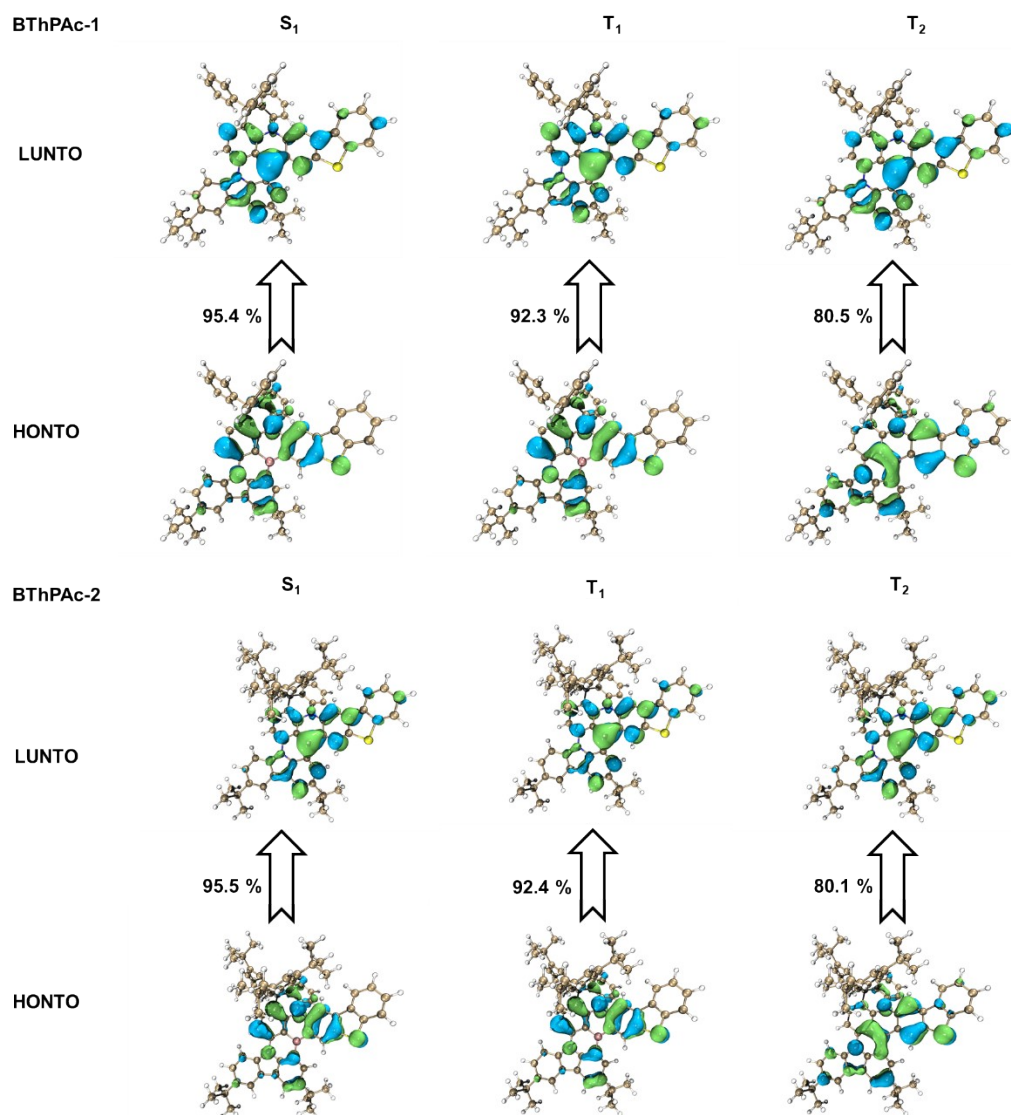

**Figure S4.** Natural transition orbitals (NTOs) for **BThPac-1** and **BThPac-2**.



**Table S2.** Summary of TD-DFT calculation results for the emitters.

| Compound        | Optimized structure | Transition | Wavelength [nm] | Energy [eV] | Oscillator strength | Electron configurations         |
|-----------------|---------------------|------------|-----------------|-------------|---------------------|---------------------------------|
| <b>BThPac-1</b> | $S_0$               | $S_0-S_1$  | 387.44          | 3.2001      | 0.4250              | H -> L 93.2%                    |
|                 |                     | $S_0-T_1$  | 451.75          | 2.7445      | 0.0000              | H -> L 87.1%<br>H-1 -> L+1 2.4% |
|                 | $S_1$               | $S_1-S_0$  | 414.09          | 3.0425      | 0.3786              | H -> L 94.2%                    |
|                 | $T_1$               | $T_1-S_0$  | 486.17          | 2.5502      | 0.0000              | H -> L 88.7%<br>H-1 -> L+1 2.1% |
| <b>BThPac-2</b> | $S_0$               | $S_0-S_1$  | 390.08          | 3.1784      | 0.4112              | H -> L 93.6%                    |
|                 |                     | $S_0-T_1$  | 454.59          | 2.7274      | 0.0000              | H -> L 88.2%<br>H-1 -> L+1 2.4% |
|                 | $S_1$               | $S_1-S_0$  | 409.75          | 3.0259      | 0.3686              | H -> L 94.3%                    |
|                 | $T_1$               | $T_1-S_0$  | 487.89          | 2.5412      | 0.0000              | H -> L 88.4%<br>H-1 > L+1 2.1%  |
| <b>PAc</b>      | $S_0$               | $S_0-S_1$  | 371.01          | 3.3418      | 0.4654              | H -> L 94.2%                    |
|                 |                     | $S_0-T_1$  | 434.20          | 2.8554      | 0.0000              | H -> L 88.7%                    |
|                 | $S_1$               | $S_1-S_0$  | 387.05          | 3.2033      | 0.4353              | H -> L 94.5%                    |
|                 | $T_1$               | $T_1-S_0$  | 456.35          | 2.7169      | 0.0000              | H -> L 88.7%                    |

## 5. Thermal characteristics

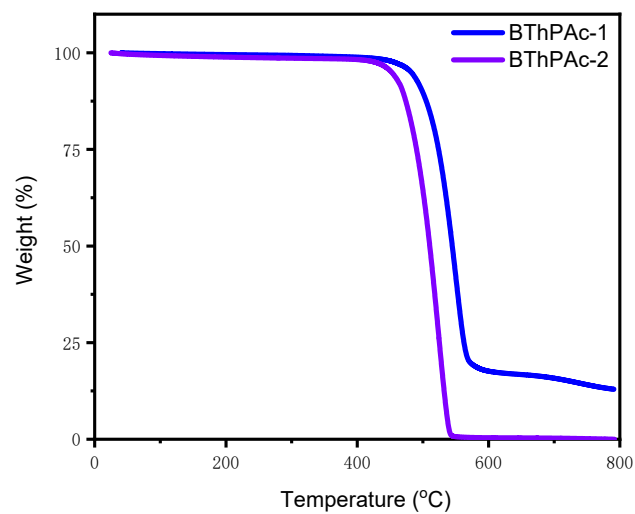

Figure S5. Thermogravimetric analysis (TGA) curves for **BThPac-1** and **BThPac-2**.

## 6. Electrochemical measurements

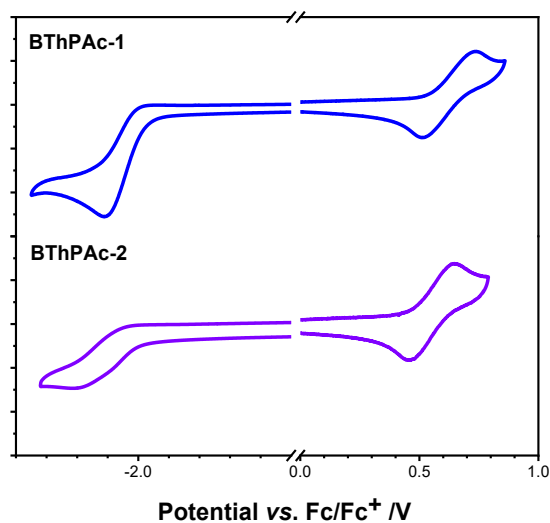

Figure S6. Cyclic voltammetry (CV) characteristics for **BThPac-1** and **BThPac-2**

## 7. Photophysical properties

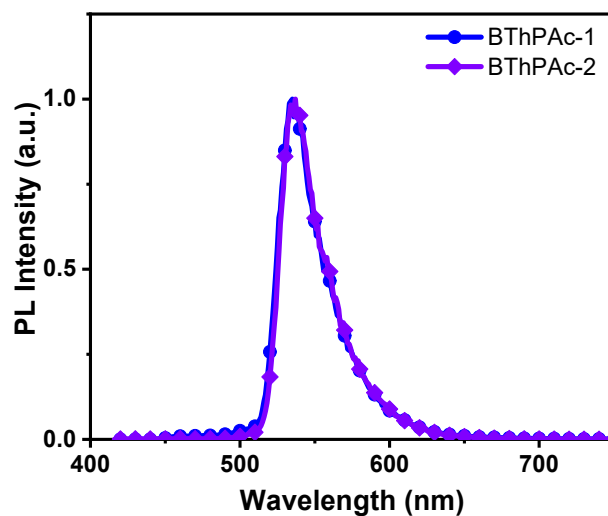

**Figure S7.** Low-temperature phosphorescence spectra (77 K) of **BThPac-1** and **BThPac-2** in toluene with concentration of  $10^{-5}$  mol L $^{-1}$ .

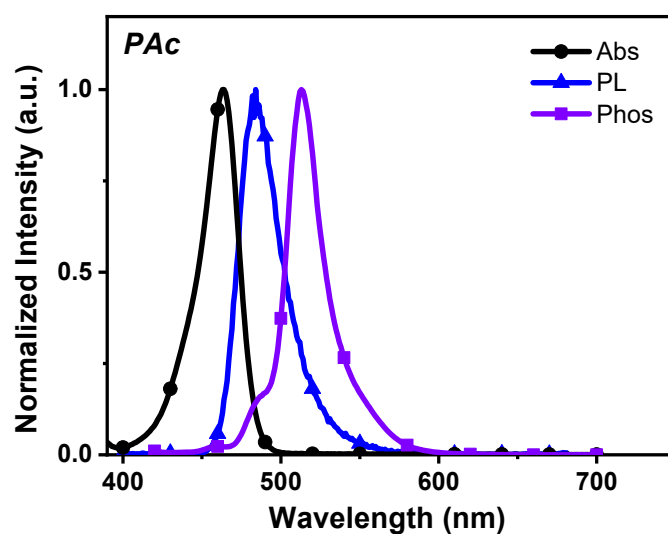

**Figure S8.** UV-visible absorption (Abs), fluorescence (PL) and phosphorescence (Phos, 77 K) spectra of **PAc** in toluene with concentration of  $10^{-5}$  mol L $^{-1}$ .

**Table S3.** Summary of photophysical properties for **PAC**.

|     | $\lambda_{\text{abs}}^{\text{a)}$ | $\lambda_{\text{em}}^{\text{b)}$ | FWHM <sup>c)</sup> | $\Phi_{\text{PLQY}}^{\text{d)}$ | $\tau_p/\tau_d^{\text{e)}$ | $k_r^{\text{f)}$          | $k_{\text{ISC}}^{\text{f)}$ | $k_{\text{RISC}}^{\text{f)}$ | $S_1/T_1^{\text{g)}$ | $\Delta E_{\text{ST}}^{\text{h)}$ |
|-----|-----------------------------------|----------------------------------|--------------------|---------------------------------|----------------------------|---------------------------|-----------------------------|------------------------------|----------------------|-----------------------------------|
|     | [nm]                              | [nm]                             | [nm]               |                                 | [ns/ $\mu$ s]              | [ $10^7 \text{ S}^{-1}$ ] | [ $10^7 \text{ S}^{-1}$ ]   | [ $10^5 \text{ S}^{-1}$ ]    | [eV]                 | [eV]                              |
| PAC | 464                               | 484                              | 30                 | 0.83                            | 6.5/17.7                   | 12.0                      | 1.5                         | 0.6                          | 2.68/2.52            | 0.16                              |

a) Absorption peak measured in toluene solution ( $10^{-5} \text{ M}$ ). b) Emission peak measured in toluene solution ( $10^{-5} \text{ M}$ ). c) Full width at half maximum of the PL spectrum. d) Photoluminescence quantum yield measured in doping films in mCP (5 wt%). e) Prompt and delayed fluorescence lifetimes of doping films. f)  $k_r$ ,  $k_{\text{ISC}}$  and  $k_{\text{RISC}}$  represents the rate constant of radiative decay of  $S_1$ , intersystem crossing from  $S_1$  to  $T_1$  and reverse intersystem crossing from  $T_1$  to  $S_1$ . g) Singlet ( $S_1$ ) and triplet ( $T_1$ ) state energy levels estimated from fluorescence peak and phosphorescence spectra. h) Energy gap between  $S_1$  and  $T_1$ .

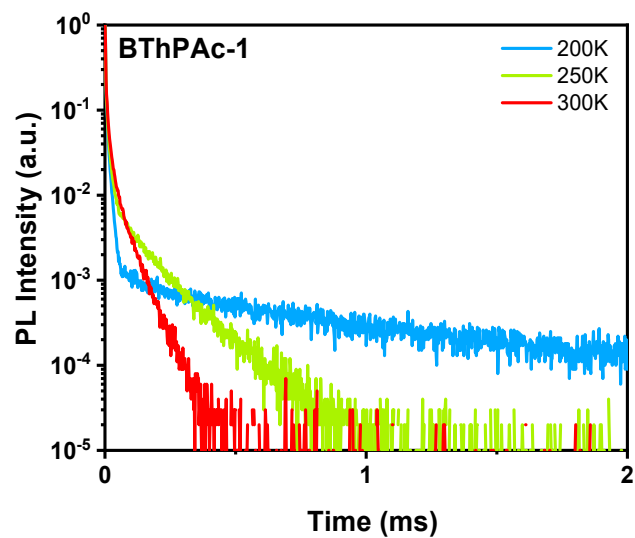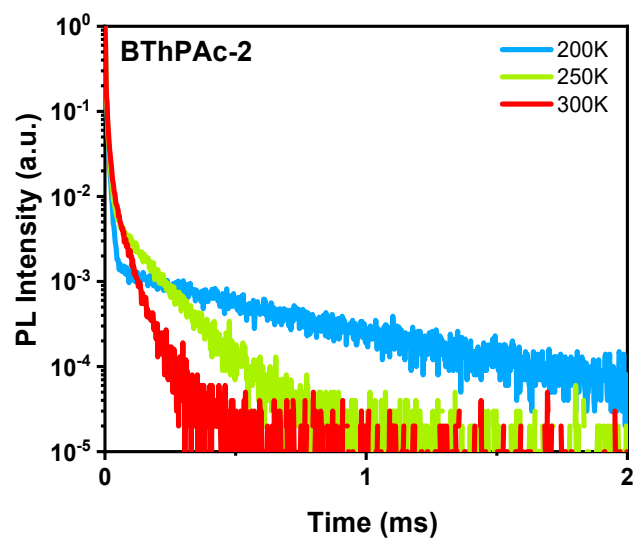

**Figure S9.** Transient PL decay spectra for **BThPac-1** and **BThPac-2** in film (1 wt % doped in mCP) at 150–300 K.

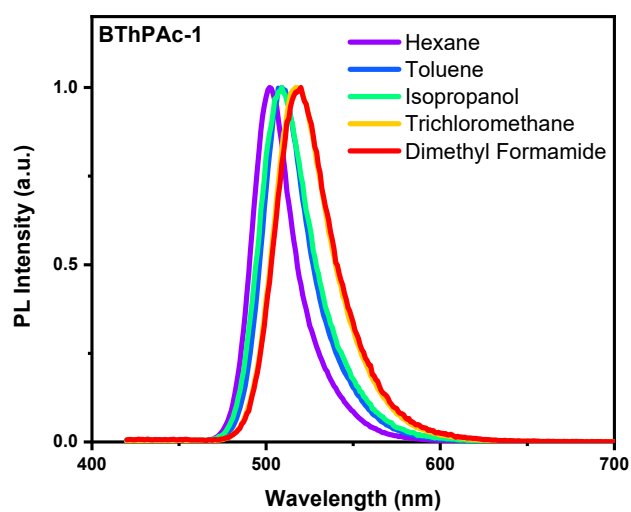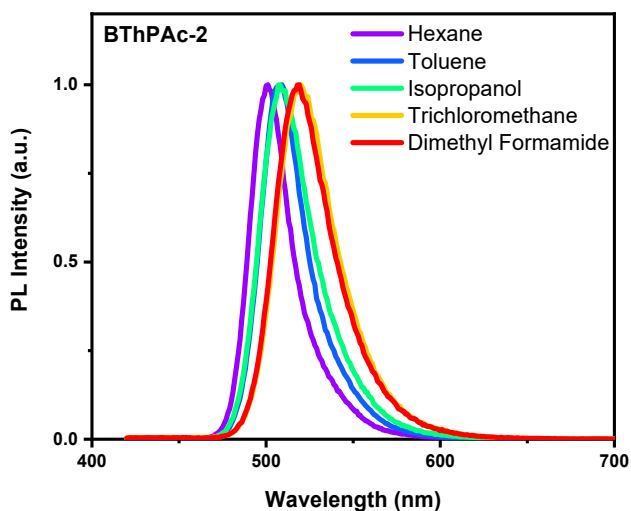

**Figure S10.** PL spectra for **BThPac-1** and **BThPac-2** in solvents with different polarity.

**Table S4.** Emission peak and FWHM for **BThPac-1** and **BThPac-2** in solvents with different polarity.

| Compound | $\lambda_{em}/FWHM$ [nm] |          |             |                  |                    |
|----------|--------------------------|----------|-------------|------------------|--------------------|
|          | Hexane                   | Toluene  | Isopropanol | Trichloromethane | Dimethyl Formamide |
| BThPac-1 | 502 / 27                 | 509 / 30 | 509 / 34    | 517 / 36         | 520 / 37           |
| BThPac-2 | 501 / 27                 | 509 / 30 | 508 / 35    | 520 / 38         | 519 / 38           |

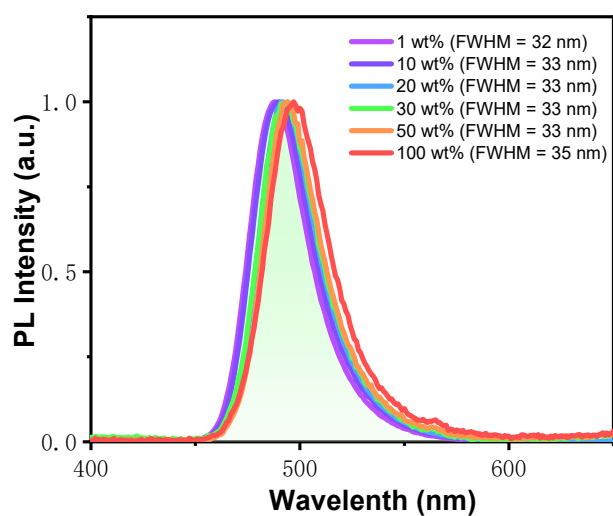

**Figure S11.** PL spectra for doped films of PAc in mCP with different dopant concentrations.

**Table S5.** Summary of emission spectra of doped films with different dopant concentrations in mCP (mCP: x wt% for BThPac-1, BThPac-2 and PAc).

|          | $\lambda_{em} / \text{FWHM} [\text{nm}]$ |        |        |        |        |        |
|----------|------------------------------------------|--------|--------|--------|--------|--------|
|          | 1%                                       | 10%    | 20%    | 30%    | 50%    | 100%   |
| BThPac-1 | 509/32                                   | 509/32 | 511/34 | 515/34 | 514/34 | 520/35 |
| BThPac-2 | 510/32                                   | 511/32 | 511/32 | 513/33 | 513/33 | 515/34 |
| PAc      | 488/32                                   | 490/33 | 492/33 | 494/33 | 494/33 | 497/35 |

## 8. OLED device performance

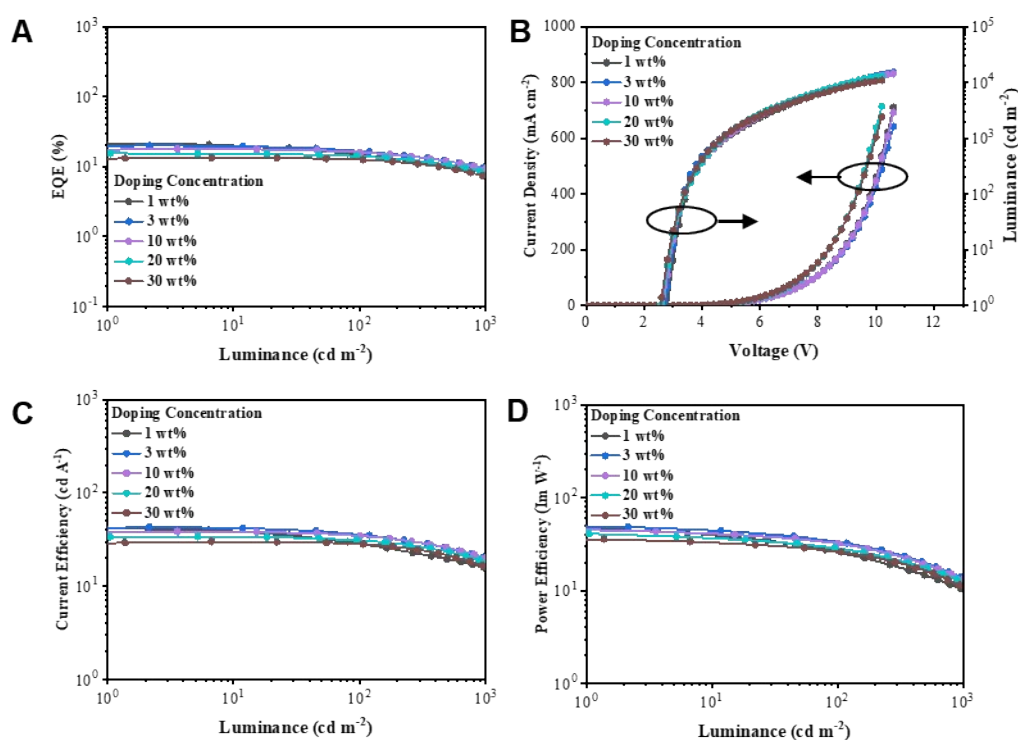

**Figure S12.** EQE-L curves (A), J-V-L curves (B), CE-L curves (C) and PE-L curves (D) for PAC-based OLEDs.

**Table S6.** Summary of OLED device performance for PAC.

| Doping Concentration | $V_{on}^a$ [V] | $L_{max}^b$ [ $cd/m^2$ ] | $CE_{max}^c$ [ $cd/A$ ] | $PE_{max}^d$ [ $lm/W$ ] | $EQE_{Max/100/1000}^e$ [%] | $FWHM^f$ [nm] | $\lambda_{EL}^g$ [nm] | $CIE^h$ (x, y) |
|----------------------|----------------|--------------------------|-------------------------|-------------------------|----------------------------|---------------|-----------------------|----------------|
| 1 wt%                | 2.80           | 14308                    | 40.2                    | 42.0                    | 20.7/15.1/8.3              | 33.4          | 489                   | 0.093, 0.399   |
| 3 wt%                | 2.68           | 15344                    | 43.2                    | 48.5                    | 20.1/16.9/9.5              | 34.9          | 492                   | 0.096, 0.469   |
| PAC 10 wt%           | 2.63           | 14297                    | 38.4                    | 43.1                    | 17.7/16.1/9.4              | 34.3          | 494                   | 0.097, 0.480   |
| 20 wt%               | 2.59           | 12741                    | 34.0                    | 40.9                    | 15.5/14.1/8.3              | 34.7          | 494                   | 0.099, 0.494   |
| 30 wt%               | 2.54           | 10864                    | 30.1                    | 35.6                    | 13.3/12.6/7.2              | 35.0          | 495                   | 0.102, 0.505   |

<sup>a)</sup> Turn-on voltage at luminance of  $1 \text{ cd m}^{-2}$ . <sup>b)</sup> Maximum luminance. <sup>c)</sup> Maximum luminous efficiency. <sup>d)</sup> Maximum power efficiency <sup>e)</sup> External quantum efficiency at maximum and at luminance of  $100/1000 \text{ cd m}^{-2}$ . <sup>f)</sup> Full-width at half-maximum at  $1000 \text{ cd/m}^2$ . <sup>g)</sup> EL maximum at  $1000 \text{ cd m}^{-2}$ . <sup>h)</sup> CIE coordinates at  $1000 \text{ cd m}^{-2}$ .



**Table.S7** Comparison for OLED performance of **BThPac-1**, **BThPac-2** and reported MR-TADF emitters with high doping concentrations (> 15 wt%).

| Emitter             | Doping Condition | EQE <sub>Max/100/1000</sub> <sup>a)</sup> | $\lambda_{EL}$ <sup>b)</sup><br>[nm] | FWHM <sup>c)</sup><br>[nm] | CIE <sup>d)</sup><br>(x, y) | Ref.      |
|---------------------|------------------|-------------------------------------------|--------------------------------------|----------------------------|-----------------------------|-----------|
| <b>BThPac-1</b>     | 3 wt%            | 24.8/22.8/15.5                            | 516                                  | 34                         | 0.17, 0.72                  | This work |
|                     | 30 wt%           | 17.0/16.9/12.9                            | 518                                  | 34                         | 0.19, 0.72                  |           |
| <b>BThPac-2</b>     | 3 wt%            | 26.5/22.0/14.4                            | 514                                  | 33                         | 0.16, 0.71                  | This work |
|                     | 30 wt%           | 20.3/20.0/14.6                            | 517                                  | 33                         | 0.18, 0.72                  |           |
| <b>D-Cz-BN</b>      | 1 wt%            | 37.2/37.2/34.3                            | 488                                  | 24                         | 0.11, 0.43                  | S9        |
|                     | 20 wt%           | 36.3/36.2/25.8                            | 491                                  | 24                         | 0.10, 0.41                  |           |
| <b>S-Cz-BN</b>      | 1 wt%            | 30.5/30.2/26.2                            | 488                                  | 26                         | 0.12, 0.43                  | S9        |
|                     | 20 wt%           | 28.8/26.9/18.9                            | 494                                  | 31                         | 0.10, 0.46                  |           |
| <b>BN-CP1</b>       | 5 wt%            | 40.0/34.0/18.5                            | 496                                  | 25                         | 0.09, 0.50                  | S10       |
|                     | 30 wt%           | 33.3/24.2/12.8                            | 496                                  | 25                         | 0.08, 0.52                  |           |
| <b>BN-CP2</b>       | 5 wt%            | 36.4/32.6/19.2                            | 497                                  | 26                         | 0.10, 0.53                  | S10       |
|                     | 30 wt%           | 23.7/20.3/9.8                             | 502                                  | 33                         | 0.16, 0.62                  |           |
| <b>M-Cz-BNCz</b>    | 3 wt%            | 27.0/24.2/14.4                            | 520                                  | 44                         | 0.23, 0.69                  | S11       |
|                     | 30 wt%           | 27.3/25.4/15.7                            | 528                                  | 47                         | 0.28, 0.67                  |           |
| <b>pBP-DABNA-Me</b> | 5 wt%            | 23.4/-/-                                  | 464                                  | 23                         | 0.13, 0.09                  | S12       |
|                     | 20 wt%           | 20.6/-/-                                  | 464                                  | 23                         | 0.13, 0.09                  |           |
| <b>tCBNDADPO</b>    | -                | -                                         | -                                    | -                          | -                           | S13       |
|                     | 30 wt%           | 30.8/23.3/16.2                            | 472                                  | 28                         | 0.14, 0.22                  |           |
| <b>DPMX-CzDABNA</b> | 5 wt%            | 24.5/15.5/8.2                             | 484                                  | 29                         | 0.11, 0.31                  | S14       |
|                     | 20 wt%           | 26.8/20.7/7.9                             | 484                                  | 29                         | 0.11, 0.33                  |           |
| <b>TCzBN-oPh</b>    | 1 wt%            | 26.0/22.9/10.4                            | 492                                  | 28                         | 0.09, 0.46                  | S15       |
|                     | 20 wt%           | 24.2/14.7/3.7                             | 496                                  | 31                         | 0.11, 0.54                  |           |
| <b>TCzBN-DPF</b>    | 1 wt%            | 24.8/19.1/11.3                            | 496                                  | 28                         | 0.09, 0.53                  | S15       |
|                     | 20 wt%           | 24.2/19.2/9.2                             | 501                                  | 36                         | 0.17, 0.60                  |           |
| <b>TCzBN-TMPh</b>   | 1 wt%            | 25.1/18.4/6.5                             | 488                                  | 27                         | 0.11, 0.38                  | S15       |
|                     | 20 wt%           | 18.6/6.9/0.8                              | 488                                  | 27                         | 0.10, 0.39                  |           |

|                    |        |                |     |    |            |     |
|--------------------|--------|----------------|-----|----|------------|-----|
| <b>D-m-1PCzBN</b>  | 2 wt%  | 32.6/29.5/22.3 | 500 | 30 | 0.10, 0.56 | S16 |
|                    | 30 wt% | 25.6/19.3/13.3 | 508 | 34 | 0.16, 0.65 |     |
| <b>D-p-1PCzBN</b>  | 2 wt%  | 33.5/26.4/16.5 | 495 | 26 | 0.07, 0.50 | S16 |
|                    | 30 wt% | 28.5/22.6/10.0 | 498 | 27 | 0.10, 0.55 |     |
| <b>BSS-Ph-TBCz</b> | 5 wt%  | 21.4/-/-       | 468 | 31 | 0.12,0.11  | S17 |
|                    | 25 wt% | 20.1/-/-       | 470 | 31 | 0.12,0.12  |     |
| <b>4FICzBN</b>     | 2 wt%  | 10.1/5.6/4.0   | 497 | 28 | 0.09, 0.53 | S18 |
|                    | 16 wt% | 10.9/6.7/4.6   | 500 | 30 | 0.11, 0.57 |     |

a) Maximum EQE and EQE at a luminance of 100/1000 cd m<sup>-2</sup>. b) EL emission maximum. c) Full-width at half-maximum for EL emission. d) CIE coordinates.

## 9. Appendix: NMR and mass spectra

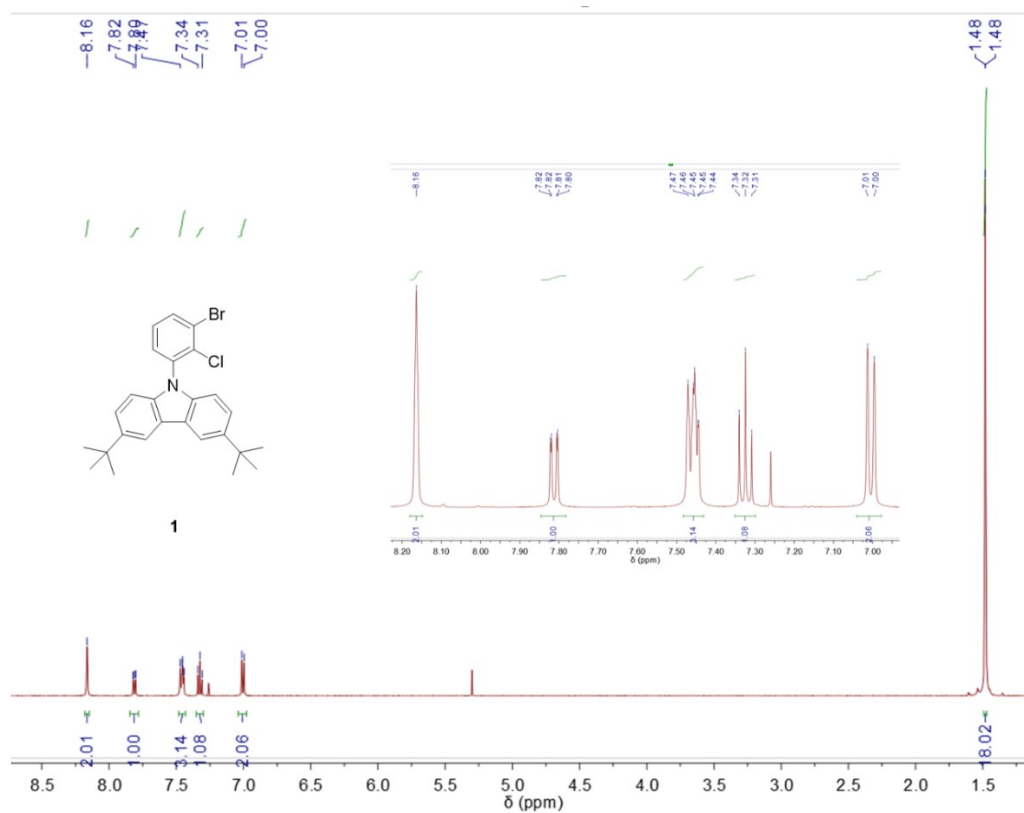

Figure S13.  $^1\text{H}$  NMR spectra of **1**.

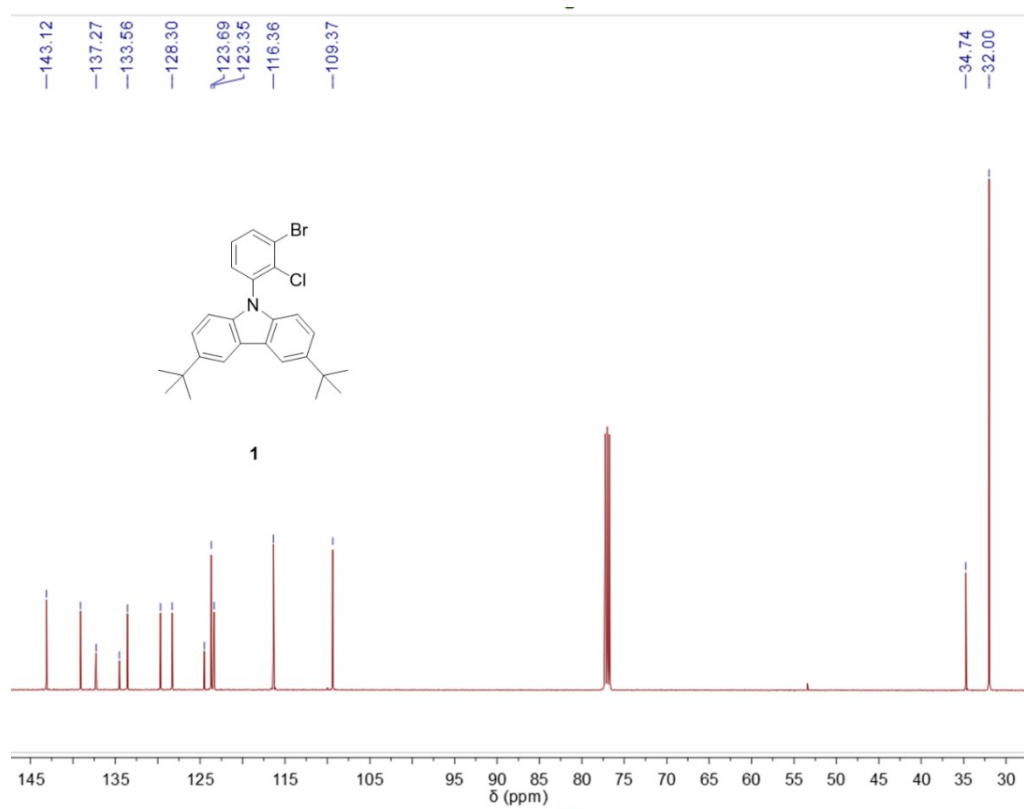

Figure S14.  $^{13}\text{C}$  NMR spectra of **1**.

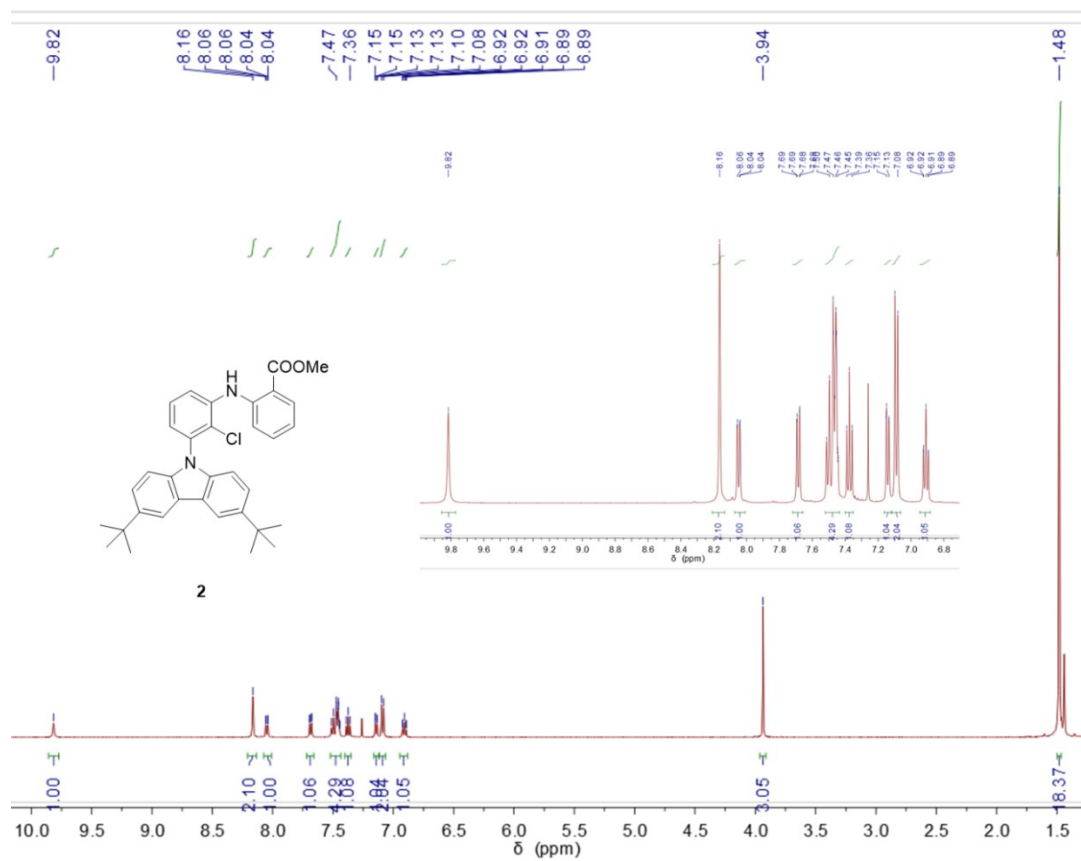

Figure S15. <sup>1</sup>H NMR spectra of 2.

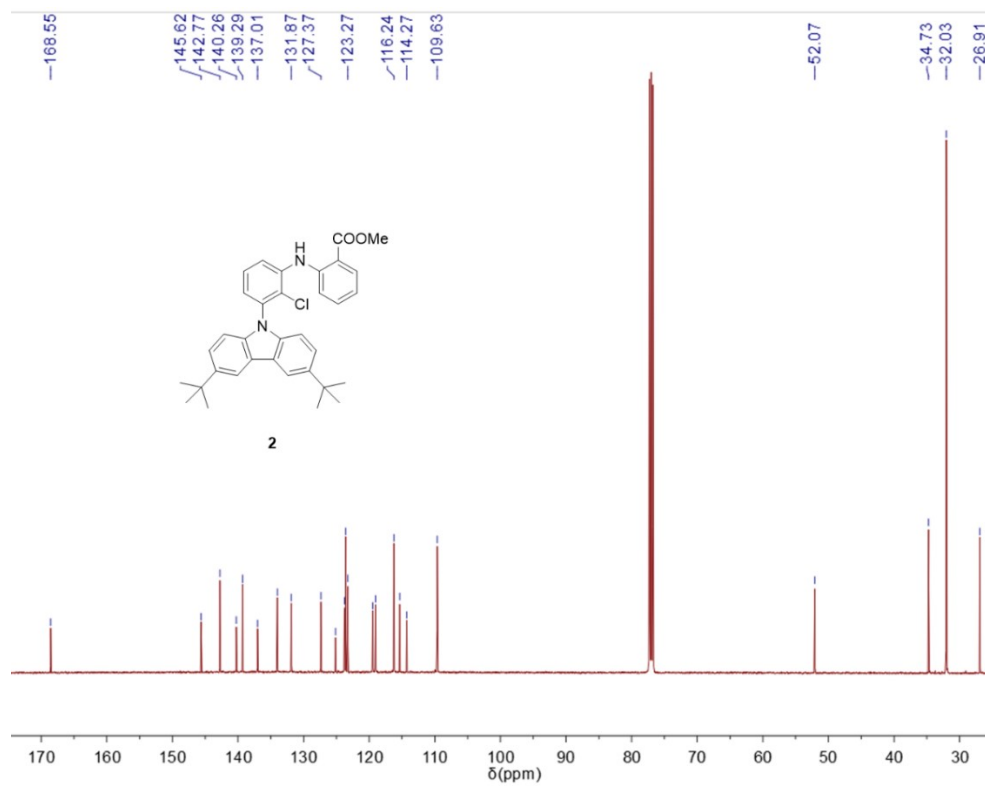

Figure S16. <sup>13</sup>C NMR spectra of 2.

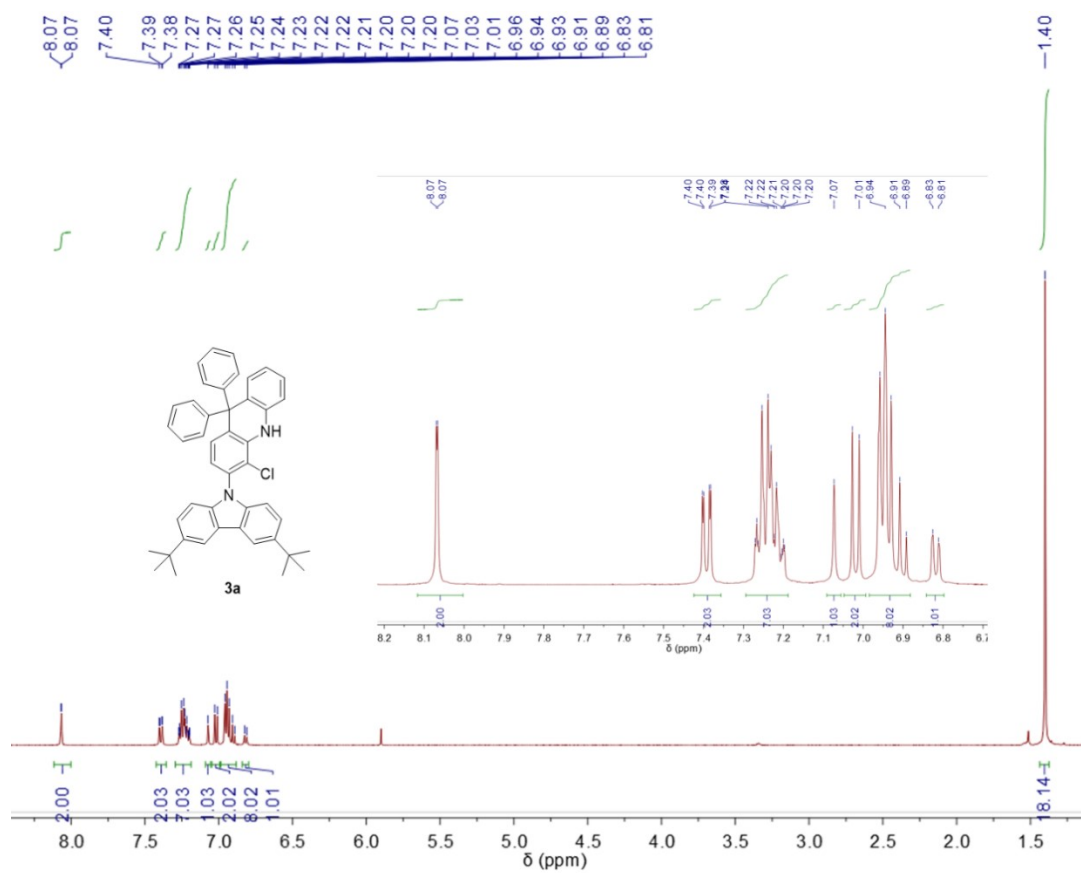

**Figure S17.  $^1\text{H}$  NMR spectra of **3a**.**

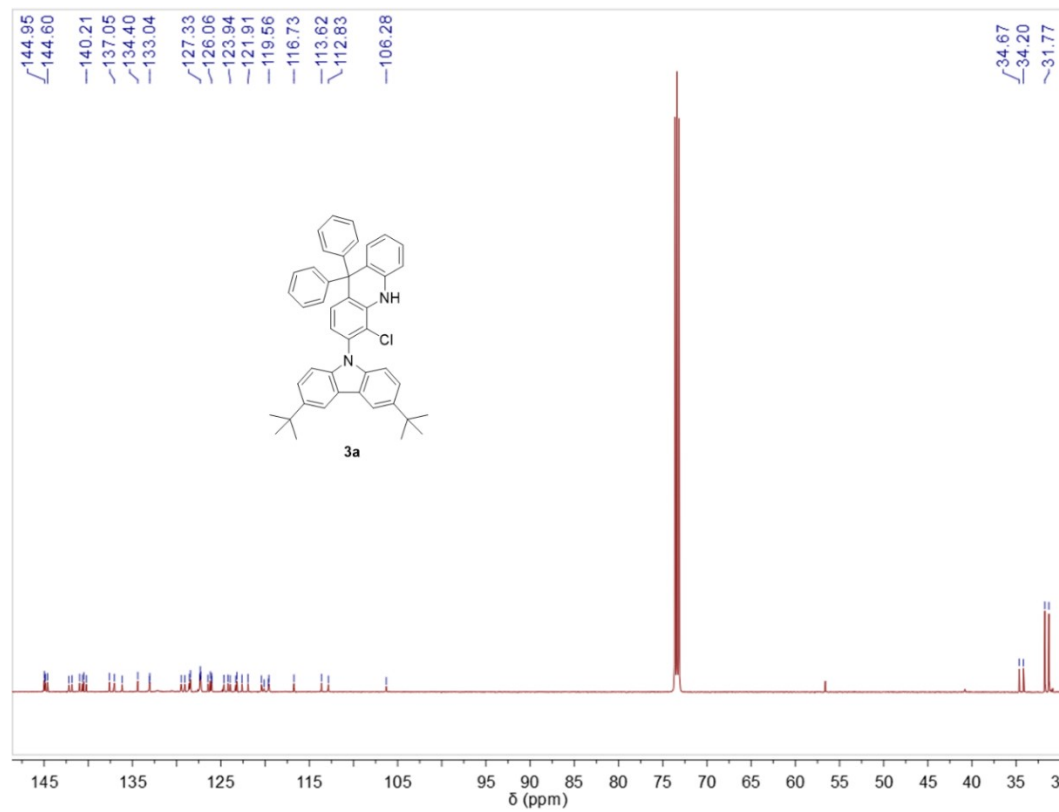

**Figure S18.  $^{13}\text{C}$  NMR spectra of **3a**.**

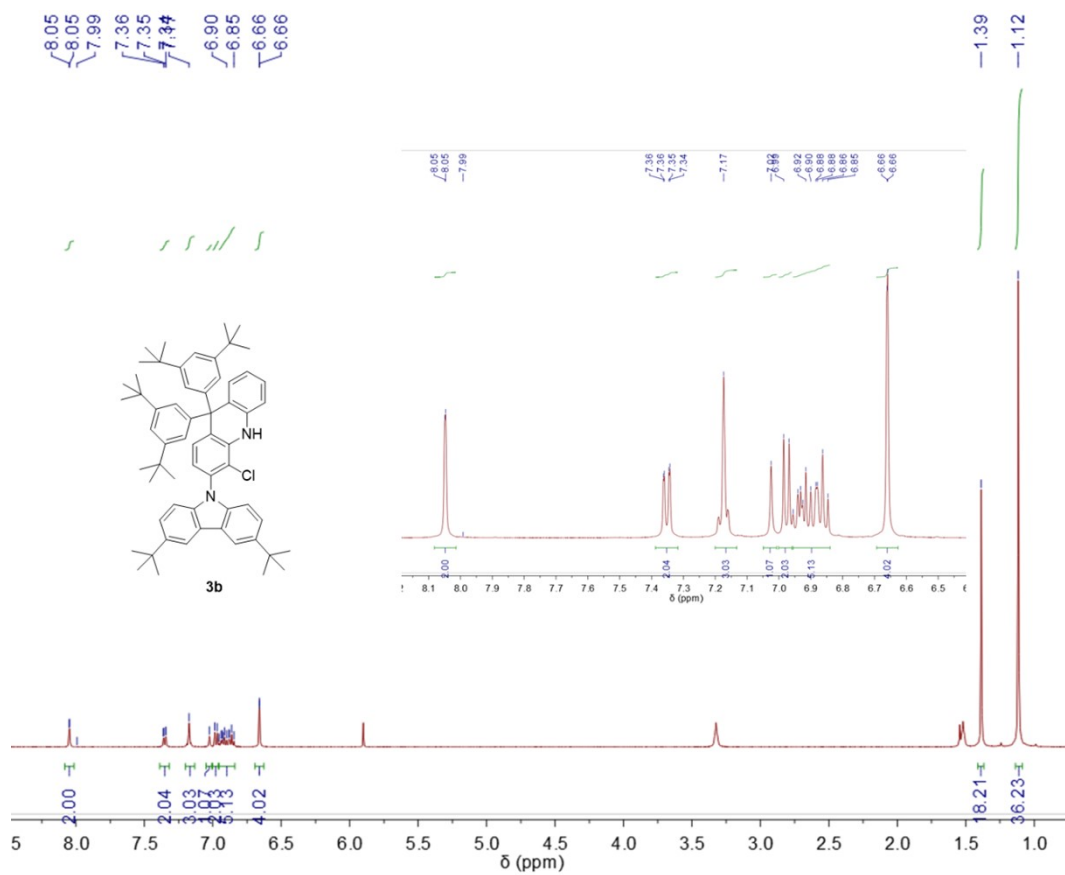

**Figure S19.** <sup>1</sup>H NMR spectra of **3b**.

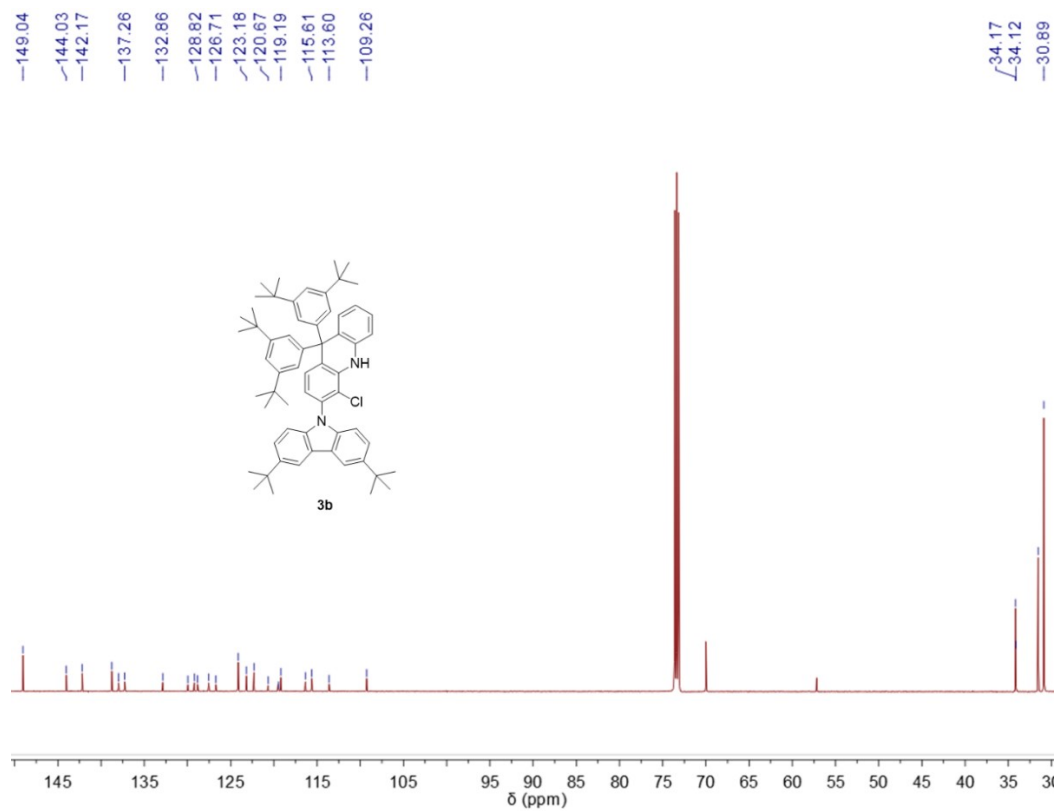

**Figure S20.** <sup>13</sup>C NMR spectra of **3b**.



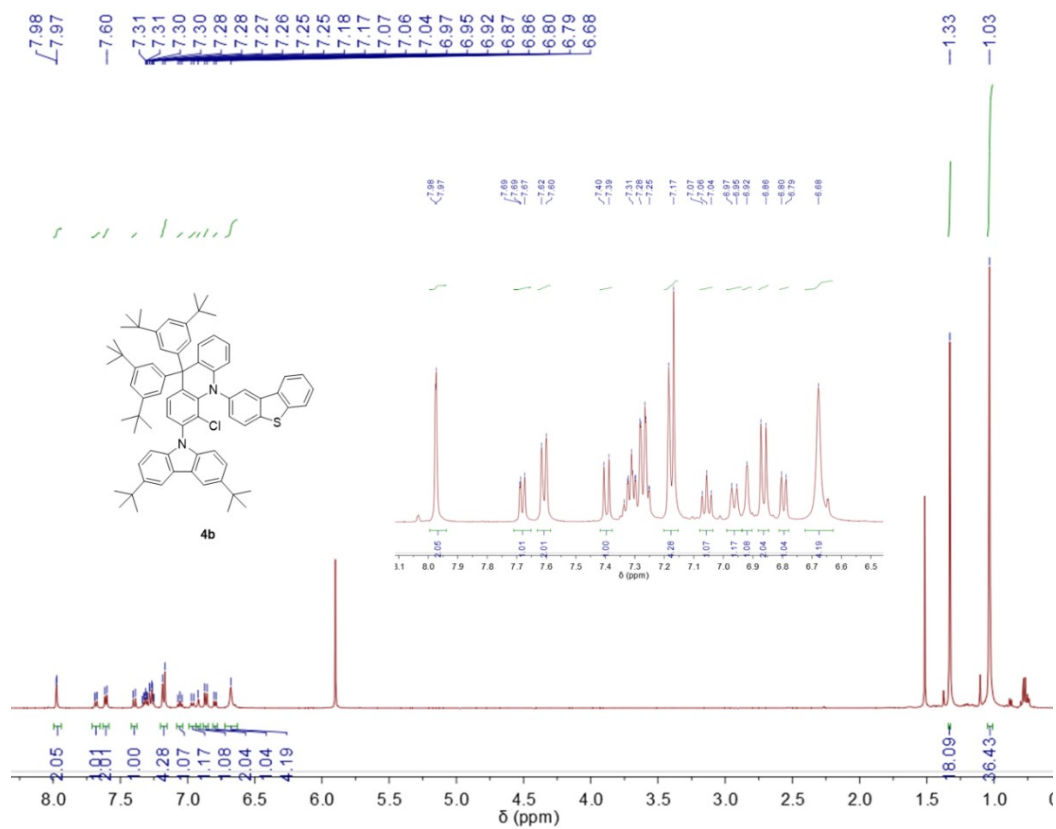

**Figure S23. <sup>1</sup>H NMR spectra of 4b.**

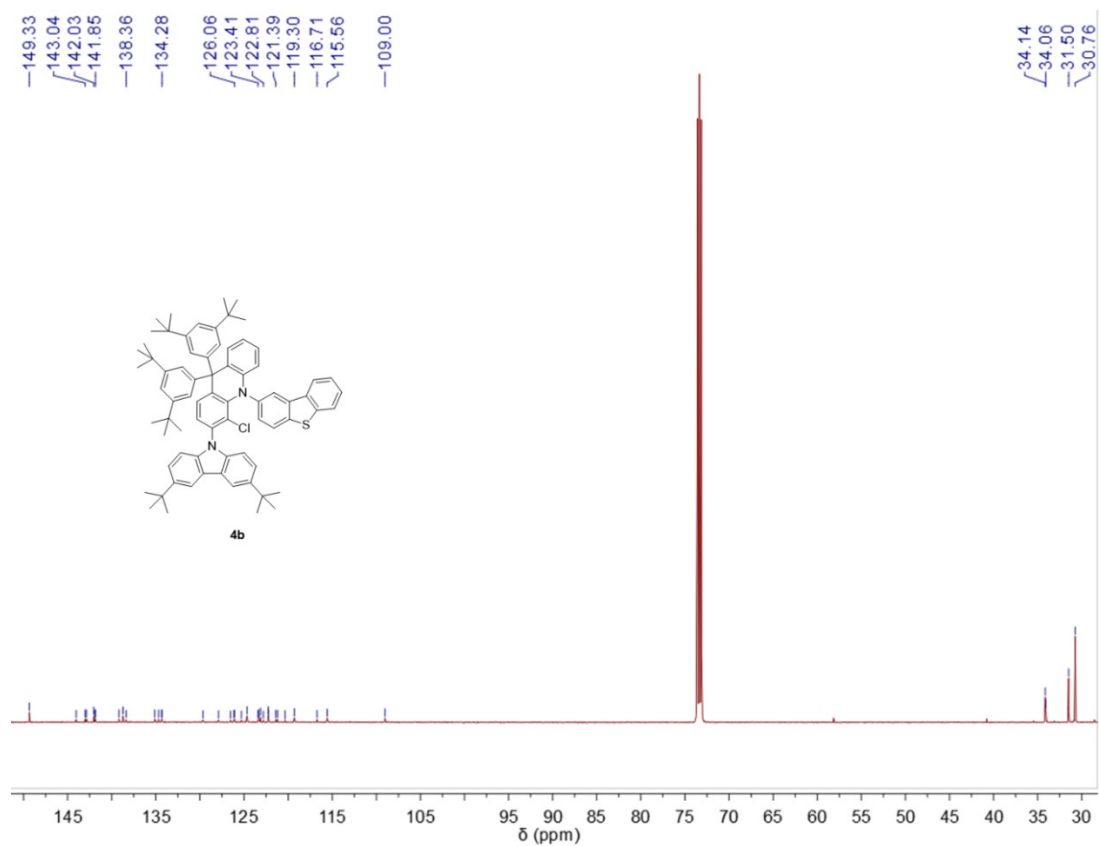

**Figure S24. <sup>13</sup>C NMR spectra of 4b.**



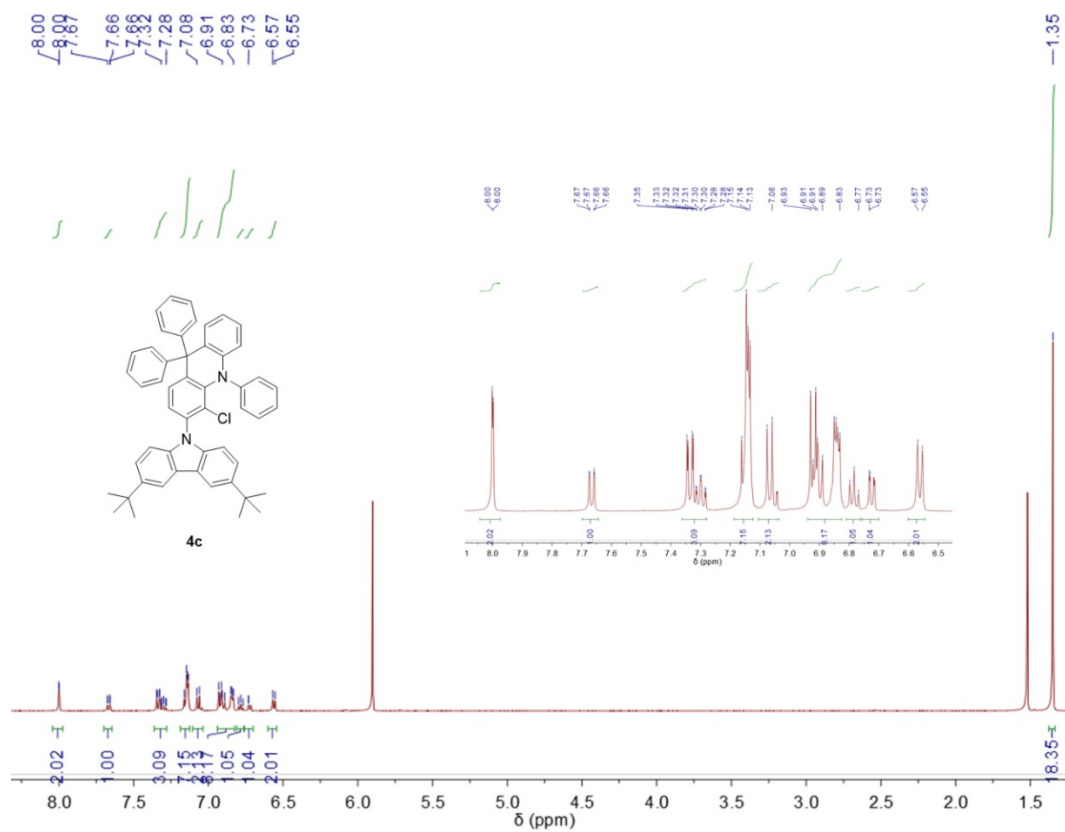

**Figure S25.** <sup>1</sup>H NMR spectra of **4c**.

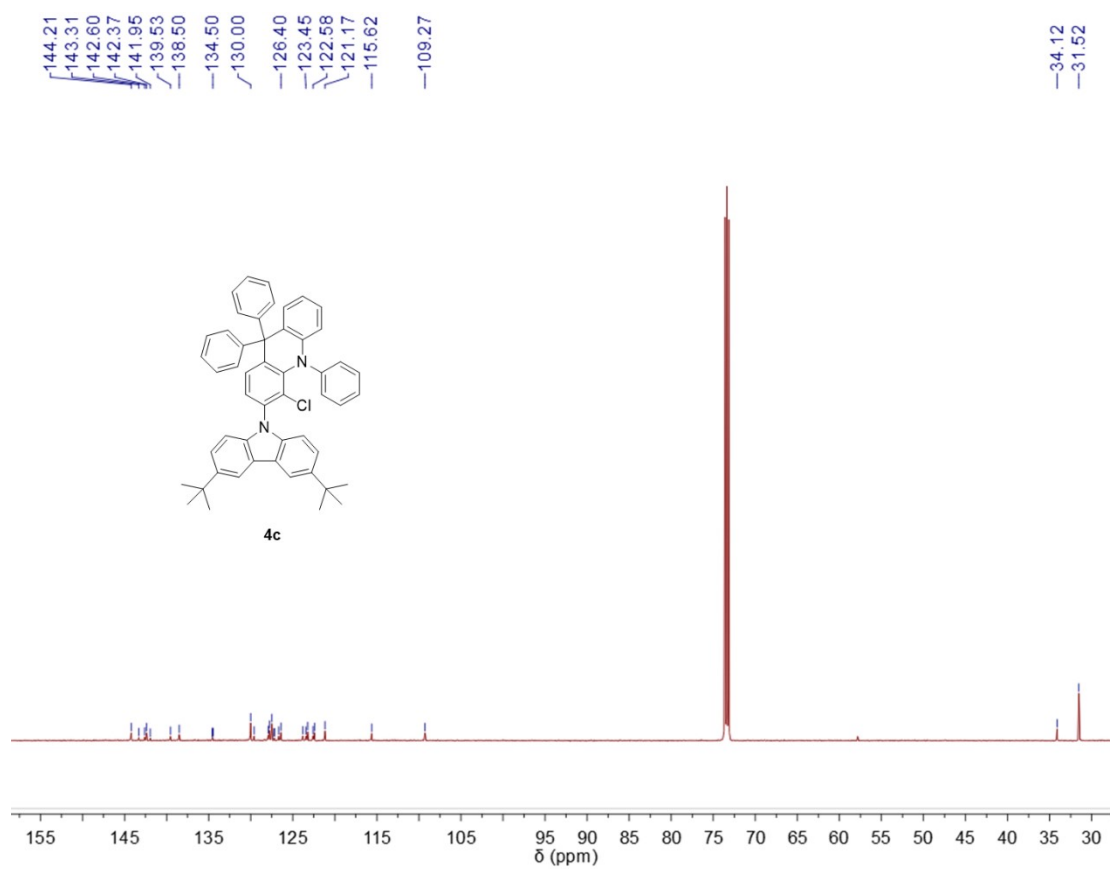

**Figure S26.** <sup>13</sup>C NMR spectra of **4c**.

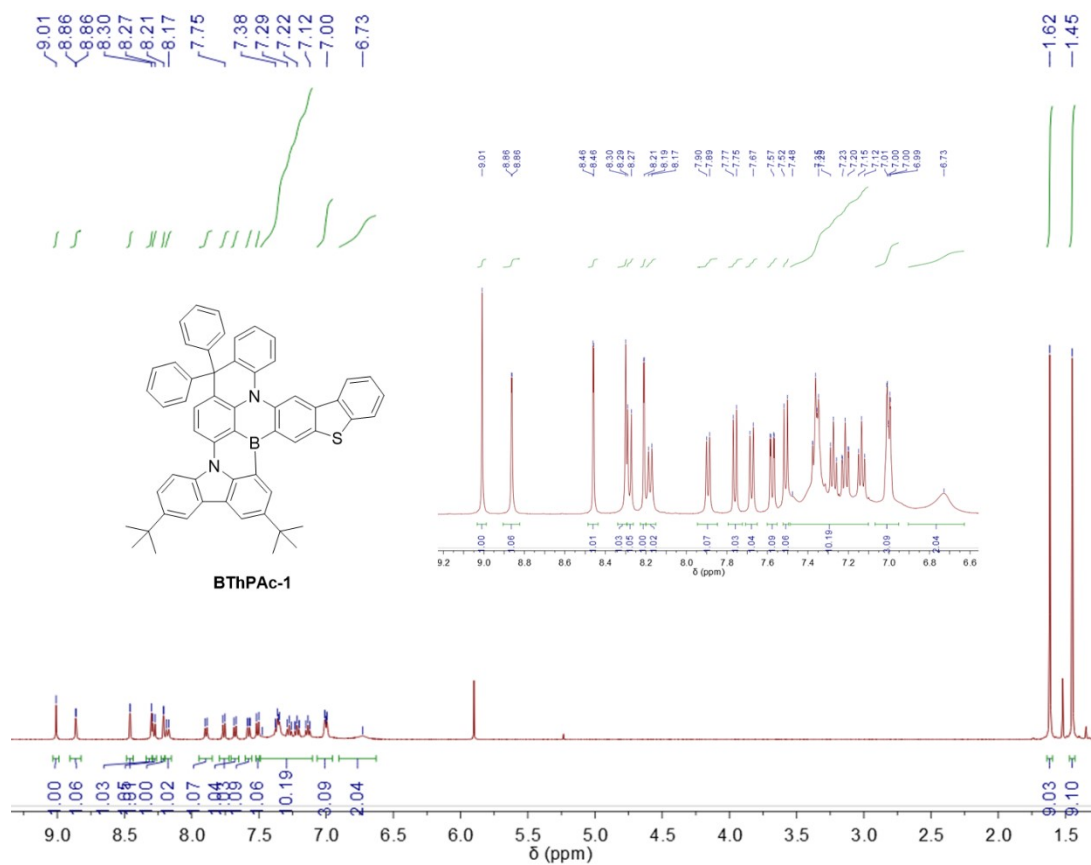

**Figure S27.**  $^1\text{H}$  NMR spectra of BThPac-1.

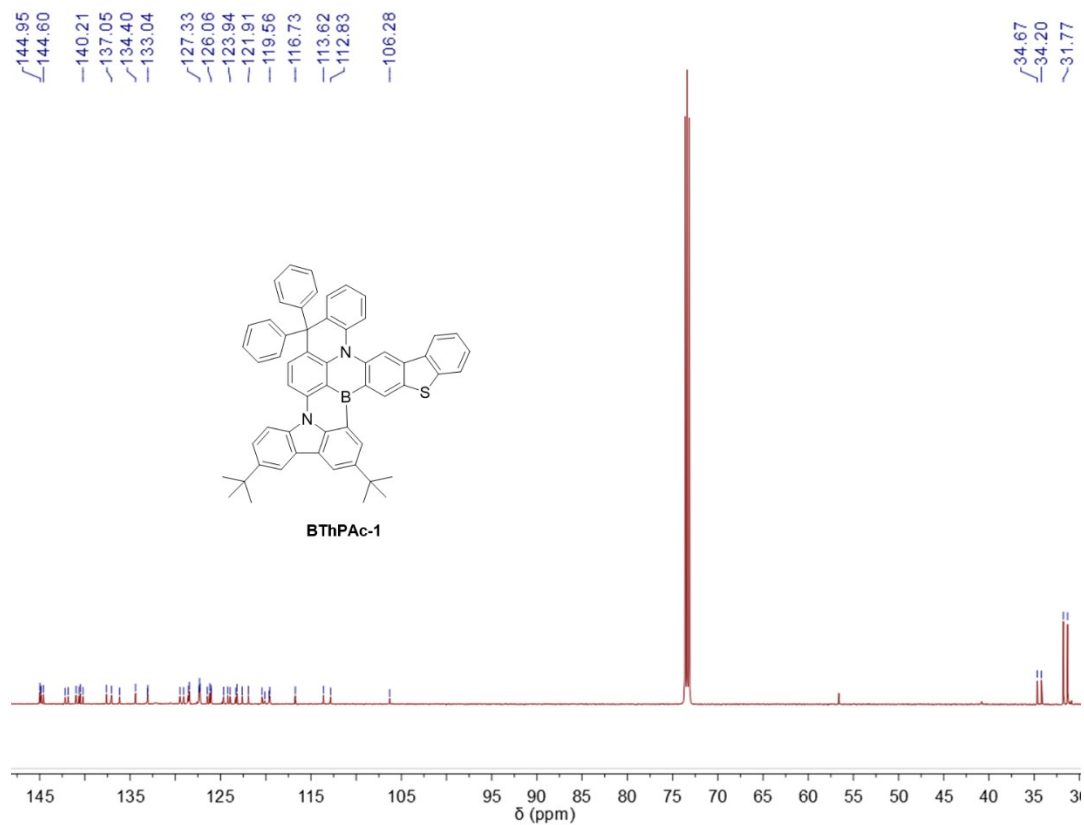

**Figure S28.**  $^{13}\text{C}$  NMR spectra of BThPac-1.

Comment 1  
Comment 2

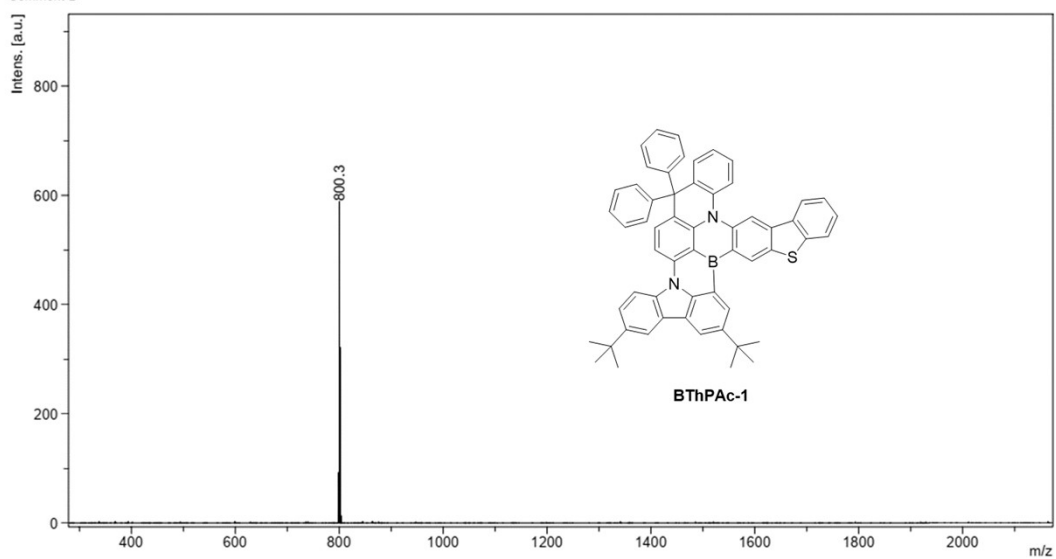

Bruker Daltonics flexAnalysis

Figure S29. MALDI-TOF of BThPac-1.

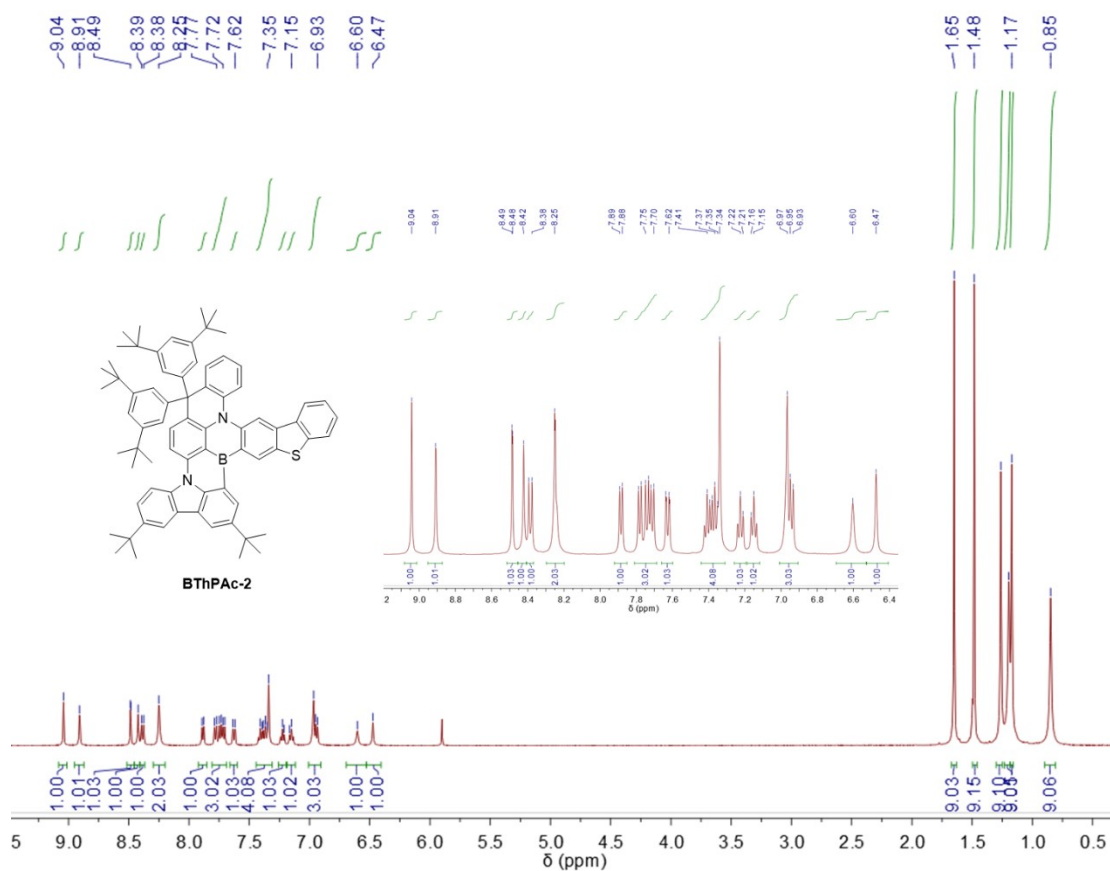

Figure S30. <sup>1</sup>H NMR spectra of BThPac-2.

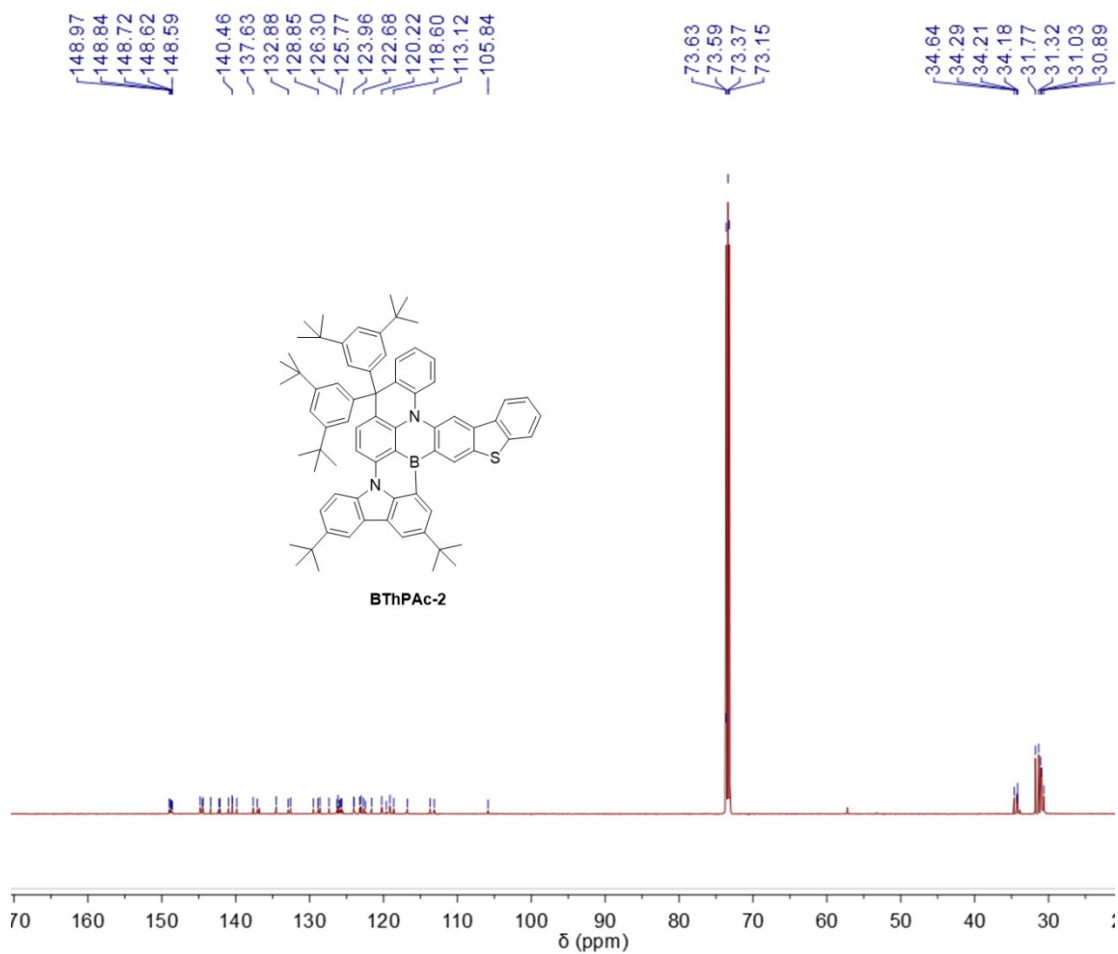

**Figure S31.**  $^{13}\text{C}$  NMR spectra of **BThPac-2**.

D:\Data\2023\0512\ms230511-11-zr-t10\_K1911

Comment 1  
Comment 2

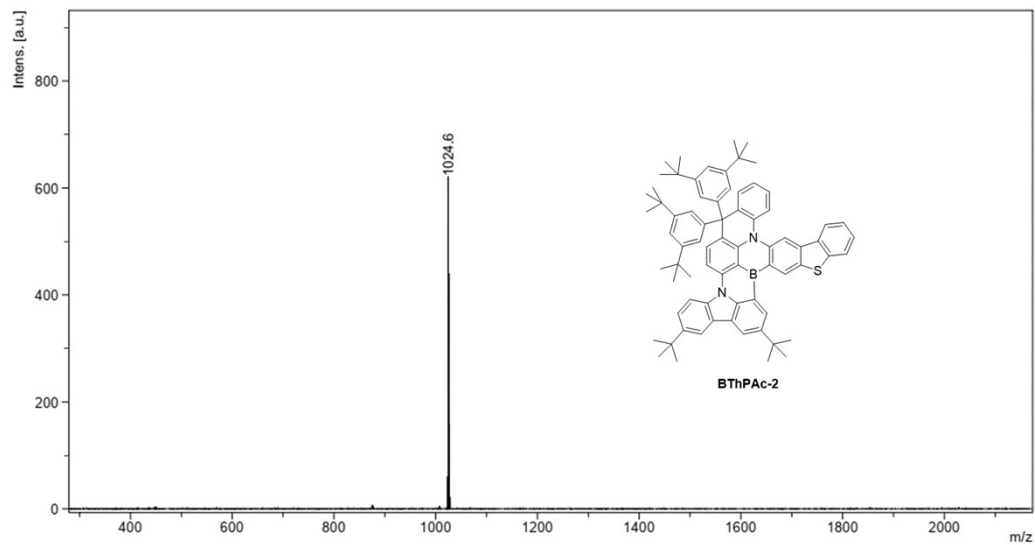

Bruker Daltonics flexAnalysis

**Figure S32.** MALDI-TOF of **BThPac-2**.

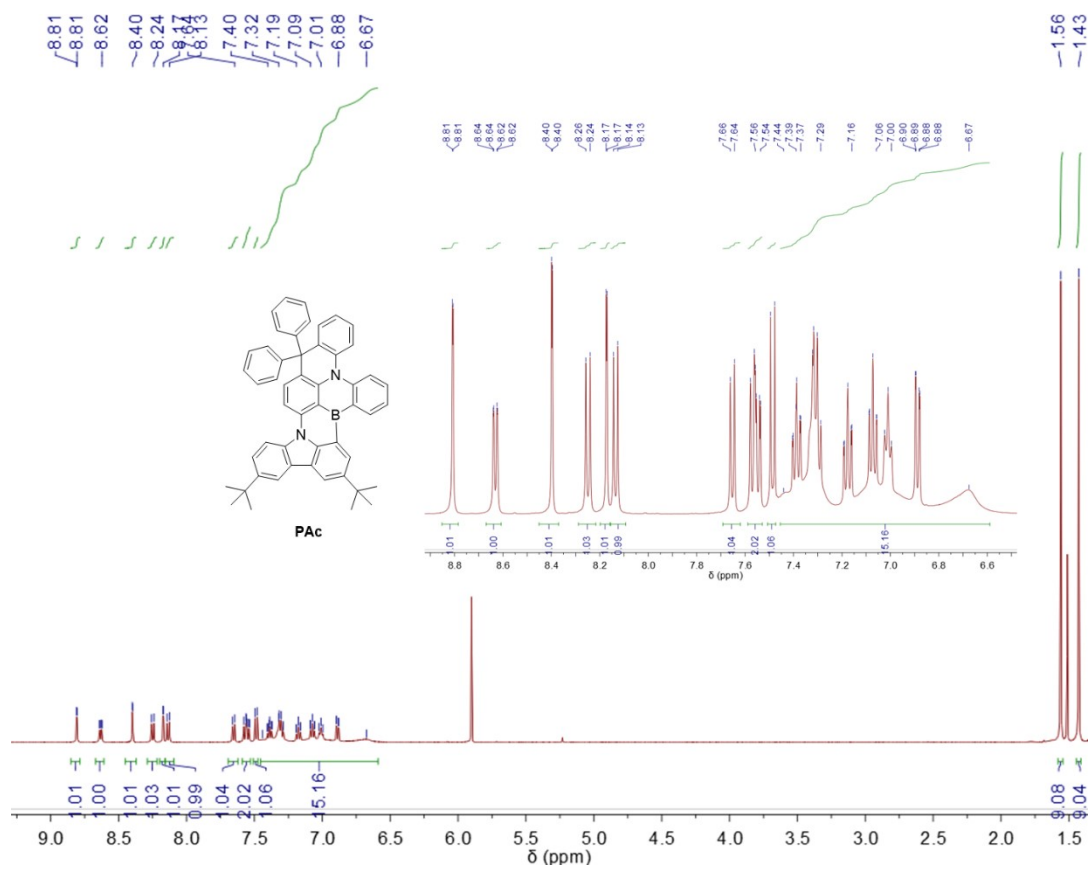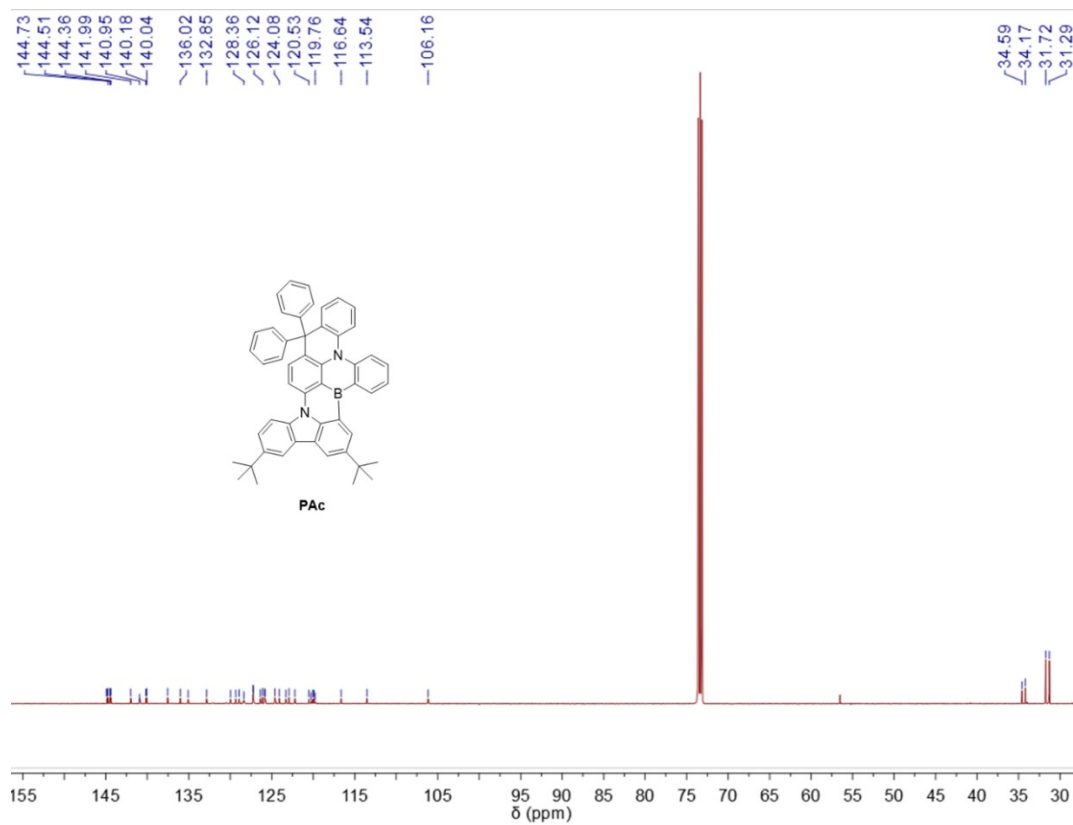

## 10.Supporting Information References

- S1 Gaussian 09, Revision C.01, Frisch, M. J.; Trucks, G. W.; Schlegel, H. B.; Scuseria, G. E.; Robb, M. A.; Cheeseman, J. R.; Scalmani, G.; Barone, V.; Mennucci, B.; Petersson, G. A.; Nakatsuji, H.; Caricato, M.; Li, X.; Hratchian, H. P.; Izmaylov, A. F.; Bloino, J.; Zheng, G.; Sonnenberg, J. L.; Hada, M.; Ehara, M.; Toyota, K.; Fukuda, R.; Hasegawa, J.; Ishida, M.; Nakajima, T.; Honda, Y.; Kitao, O.; Nakai, H.; Vreven, T.; Montgomery, Jr., J. A.; Peralta, J. E.; Ogliaro, F.; Bearpark, M.; Heyd, J. J.; Brothers, E.; Kudin, K. N.; Staroverov, V. N.; Keith, R.; Kobayashi, R.; Normand, J.; Raghavachari, K.; Rendell, A.; Burant, J. C.; Iyengar, S. S.; Tomasi, J.; Cossi, M.; Rega, N.; Millam, N. J.; Klene, M.; Knox, J. E.; Cross, J. B.; Bakken, V.; Adamo, C.; Jaramillo, J.; Gomperts, R.; Stratmann, R. E.; Yazyev, O.; Austin, A. J.; Cammi, R.; Pomelli, C.; Ochterski, J. W.; Martin, R. L.; Morokuma, K.; Zakrzewski, V. G.; Voth, G. A.; Salvador, P.; Dannenberg, J. J.; Dapprich, S.; Daniels, A. D.; Farkas, Ö.; Foresman, J. B.; Ortiz, J. V.; Cioslowski, J.; Fox, D. J. Gaussian, Inc., Wallingford CT, 2010., accessed.
- S2 F. Weigend, *Phys. Chem. Chem. Phys.* 2006, **8**, 1057.
- S3 F. Neese, *WIREs Comput. Mol. Sci.* 2017, **8**, e1327.
- S4 M. Kallay, P. R. Nagy, D. Mester, Z. Rolik, G. Samu, J. Csontos, J. Csoka, P. B. Szabo, L. Gyevi-Nagy, B. Hegely, I. Ladjanszki, L. Szegedy, B. Ladoczki, K. Petrov, M. Farkas, P. D. Mezei, A. Ganyecz, *J. Chem. Phys.* 2020, **152**, 074107.
- S5 "MRCC, a quantum chemical program suite written by M. Kállay, P. R. Nagy, D. Mester, L. Gyevi-Nagy, J. Csóka, P. B. Szabó, Z. Rolik, G. Samu, J. Csontos, B. Hégyely, Á. Ganyecz, I. Ladjánszki, L. Szegedy, B. Ladóczy, K. Petrov, M. Farkas, P. D. Mezei, and R. A. Horváth. See [www.mrcc.hu](http://www.mrcc.hu)," accessed.
- S6 T. Lu, F. Chen, *J. Comput. Chem.* 2012, **33**, 580.
- S7 W. Humphrey, Dalke, A. and Schulten, K., *J. Molec. Graphics* 1996, **14.1**, 33.
- S8 N. Ikeda, S. Oda, R. Matsumoto, M. Yoshioka, D. Fukushima, K. Yoshiura, N. Yasuda, T. Hatakeyama, *Adv. Mater.* 2020, **32**, 2004072
- S9 Y. Zhang, J. Wei, D. Zhang, C. Yin, G. Li, Z. Liu, X. Jia, J. Qiao, L. Duan, *Angew. Chem. Int. Ed.* 2022, **61**, e202113206.
- S10 P. Jiang, J. Miao, X. Cao, H. Xia, K. Pan, T. Hua, X. Lv, Z. Huang, Y. Zou, C. Yang, *Adv. Mater.* 2022, **34**, 2106954.
- S11 Y. Xu, C. Li, Z. Li, Q. Wang, X. Cai, J. Wei, Y. Wang, *Angew. Chem. Int. Ed.* 2020, **59**, 17442.
- S12 H. J. Cheon, S. J. Woo, S. H. Baek, J. H. Lee, Y. H. Kim, *Adv. Mater.* 2022, **34**, 2207416.
- S13 J. Bian, S. Chen, L. Qiu, R. Tian, Y. Man, Y. Wang, S. Chen, J. Zhang, C. Duan, C. Han, H. Xu, *Adv. Mater.* 2022, **34**, 2110547.
- S14 Y. N. Hu, X. C. Fan, F. Huang, Y. Z. Shi, H. Wang, Y. C. Cheng, M. Y. Chen, K. Wang, J. Yu, X. H. Zhang, *Adv. Opt. Mater.* 2022, **11**, 2202267.
- S15 F. Huang, X. C. Fan, Y. C. Cheng, H. Wu, Y. Z. Shi, J. Yu, K. Wang, C. S. Lee, X. H. Zhang, *Mater. Horiz.* 2022, **9**, 2226.
- S16 X. F. Luo, H. X. Ni, X. Liang, D. Yang, D. Ma, Y. X. Zheng, J. L. Zuo, *Adv. Opt. Mater.* 2023, **11**, 2203002.
- S17 Y. Chang, Y. Wu, K. Zhang, S. Wang, X. Wang, S. Shao, L. Wang, *Dyes and Pigments* 2023, **220**, 111678.
- S18 N. Peethani, N. Y. Kwon, C. W. Koh, S. H. Park, J. M. Ha, M. J. Cho, H. Y. Woo, S. Park, D. H. Choi, *Adv. Opt. Mater.* 2023, **12**, 2301217.
